# Supplementary material for: Coumarin–amino acid hybrids as promising anticancer agents: design, synthesis, docking studies and CK2 inhibition
Source: Royal Society of Chemistry journal article supplement (doi:10.1039/d4ra04226c), 2024-01-01
Supplement: d4ra04226c1.pdf [file d4ra04226c1.pdf]

## Coumarin-Amino Acid Hybrids as Promising Anticancer Agents: Design, Synthesis, Docking Studies and Ck2 Inhibition

Abd-Allah S. El-Etrawy<sup>1,2</sup>, Ahmad. Ramadan<sup>3</sup>, Farag F. Sherbiny<sup>4</sup>, I. F. Zeid<sup>3</sup>, A. A.-H. Abdel-Rahman<sup>3</sup> Mohamed A. Hawata<sup>3</sup>

<sup>1</sup>Department of Chemistry, Basic Sciences Center, Misr University for Science and Technology (MUST), Al-Motamayez District, 6th of the October City 77, Egypt.

<sup>2</sup>Department of Pharmaceutical Organic Chemistry College of Pharmaceutical Science & Drug Manufacturing, Misr University for Science and Technology (MUST), Al-Motamayez District, 6th of the October City 77, Egypt.

<sup>3</sup>Department of Chemistry, Faculty of Science, Menoufia University, Shebin El-Koam, Egypt.

<sup>4</sup>Pharmaceutical Organic Chemistry Department, Faculty of Pharmacy (Boys), Al-Azhar University, Cairo 11884, Egypt

IR of Compound 3

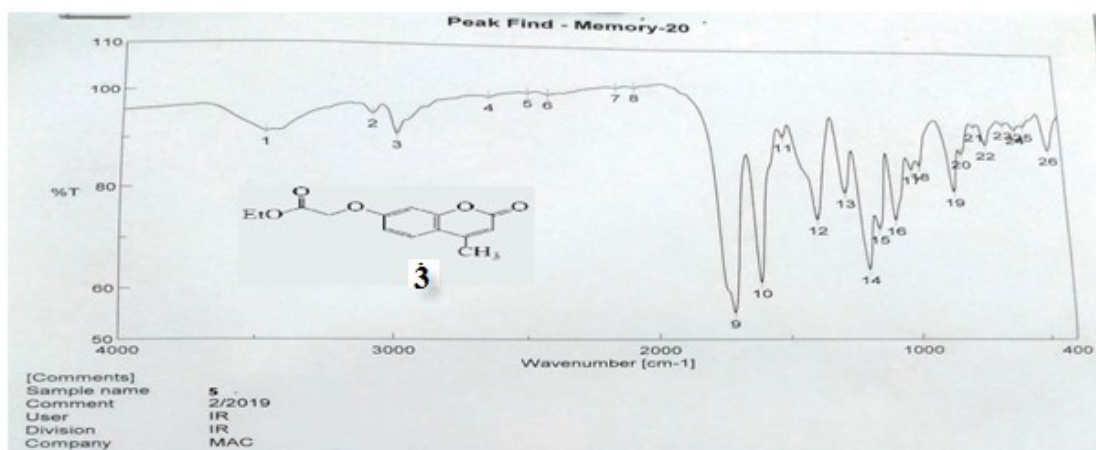

IR of Compound 4

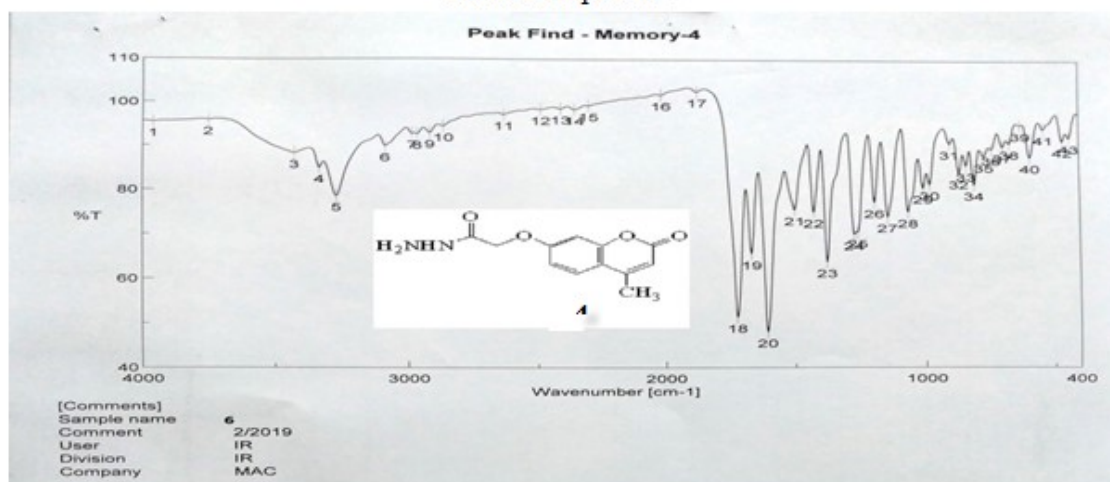

IR of Compound 5a

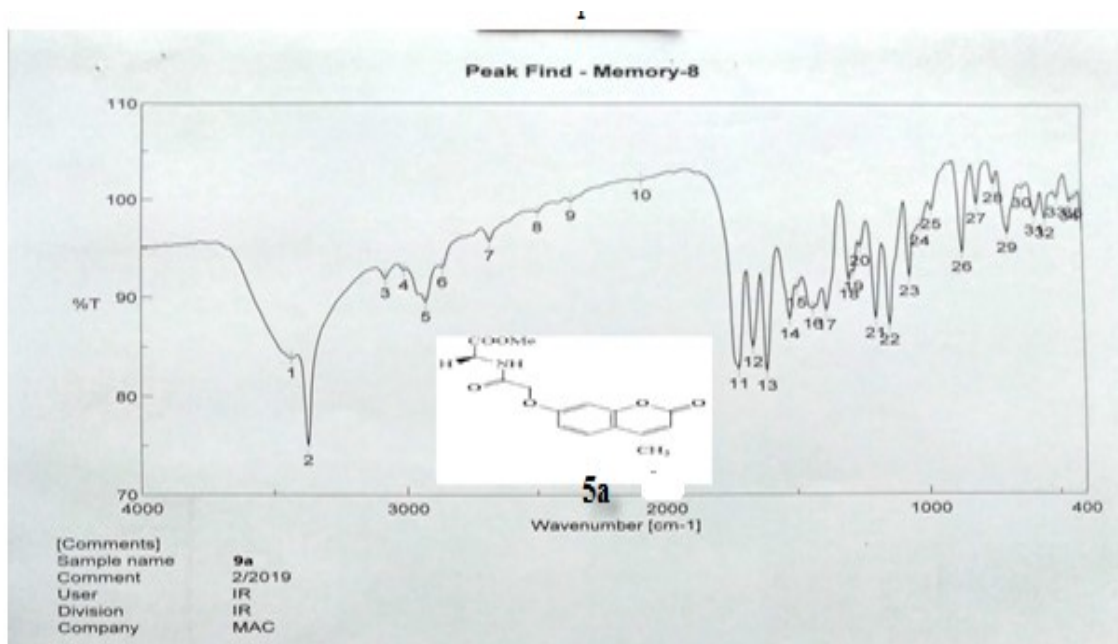

### <sup>1</sup>H NMR of Compound 5a

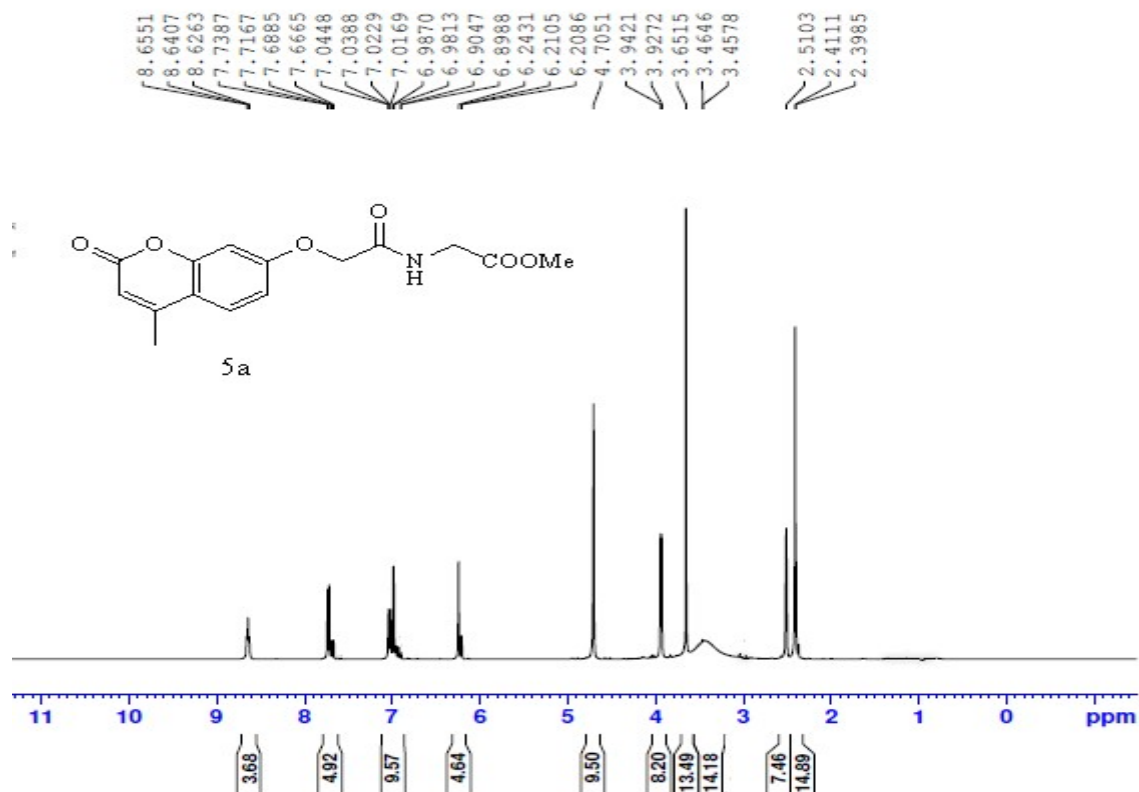

### <sup>13</sup>C NMR of Compound 5a

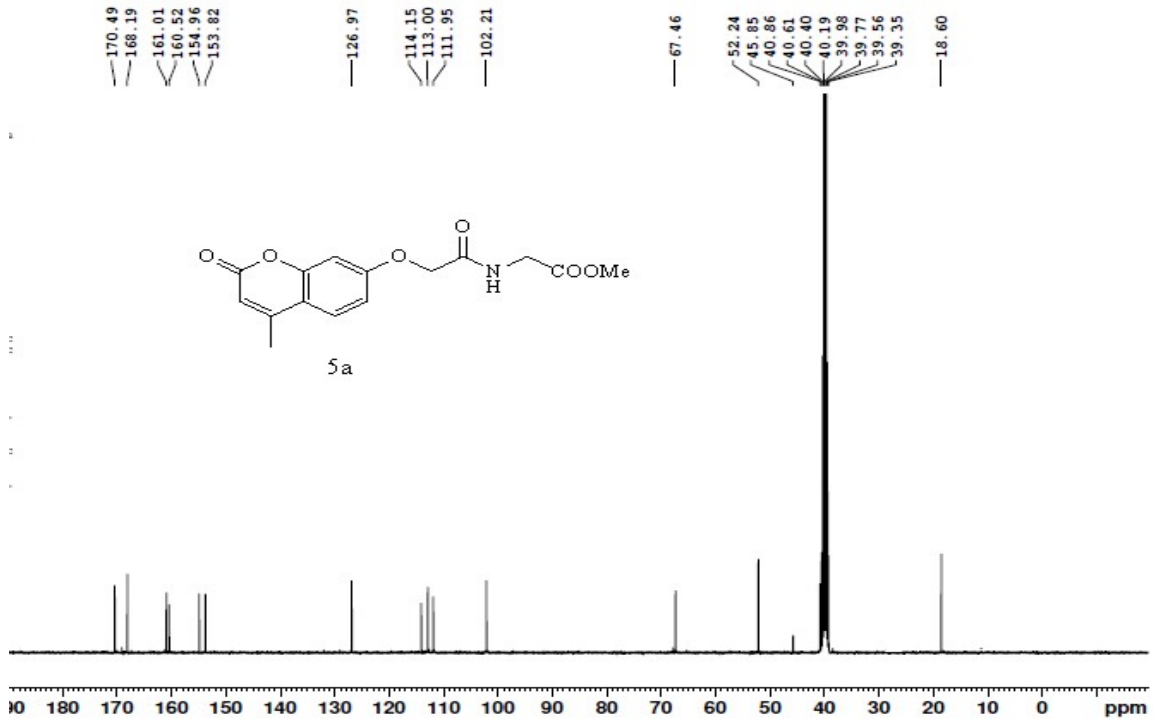

Mass spectroscopy of Compound 5a

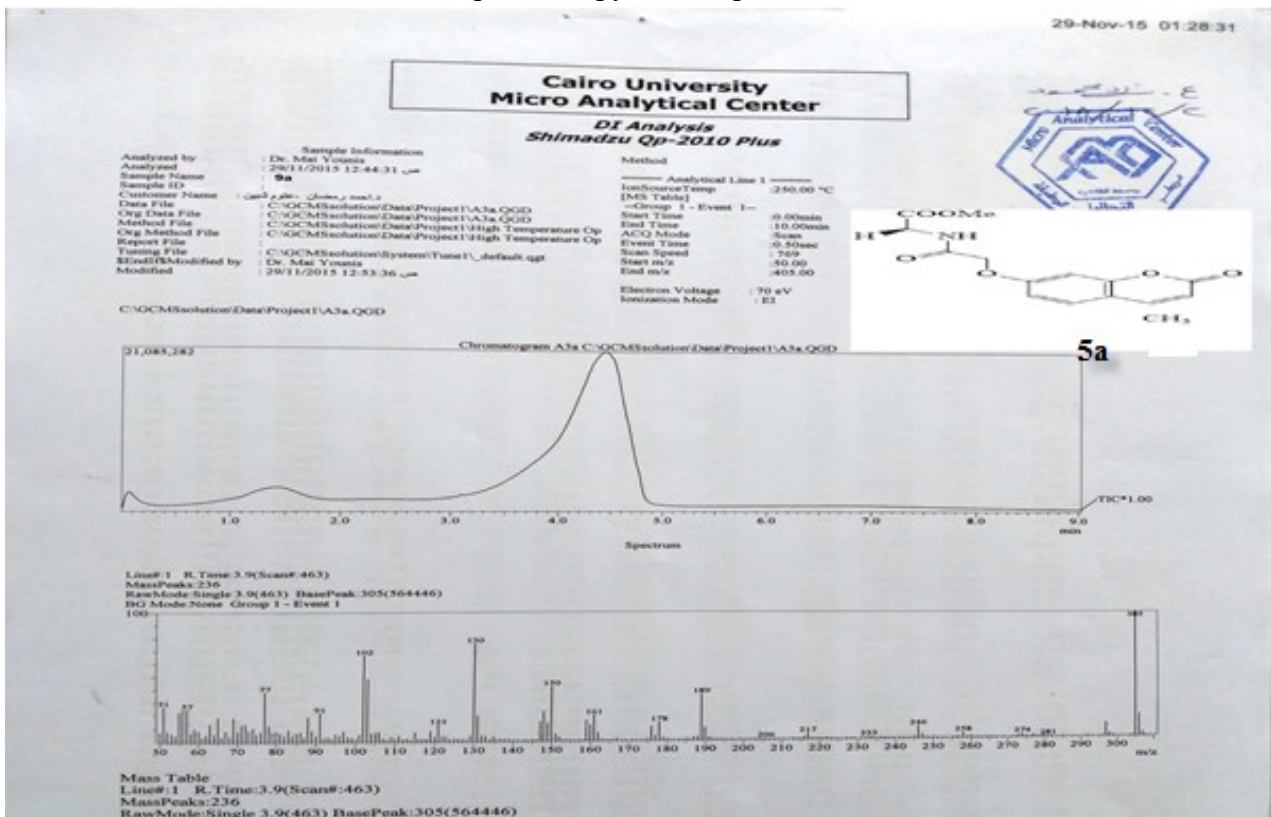

IR of Compound 5b

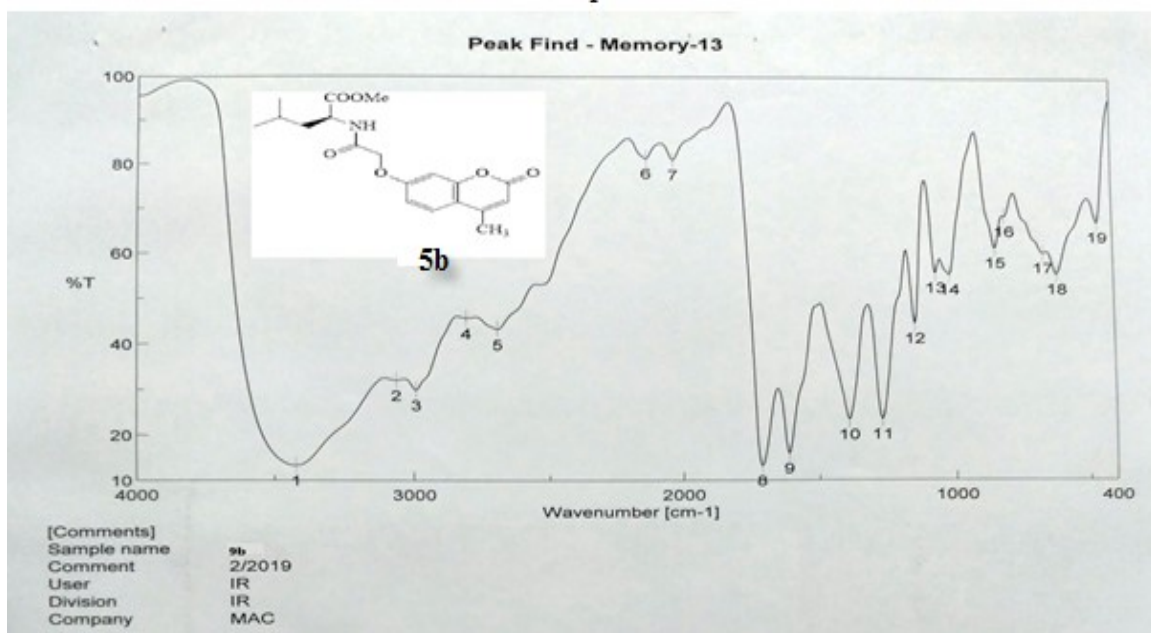

### <sup>1</sup>H NMR of Compound 5b

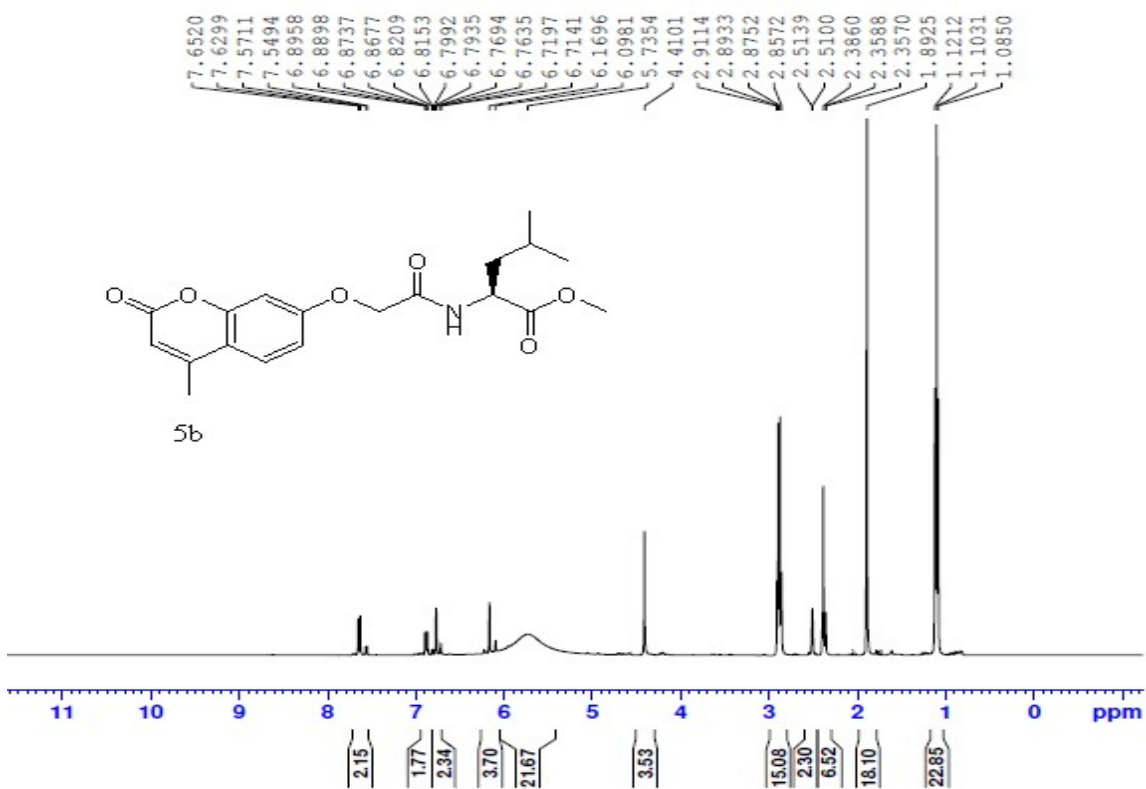

### <sup>13</sup>C NMR of Compound 5b

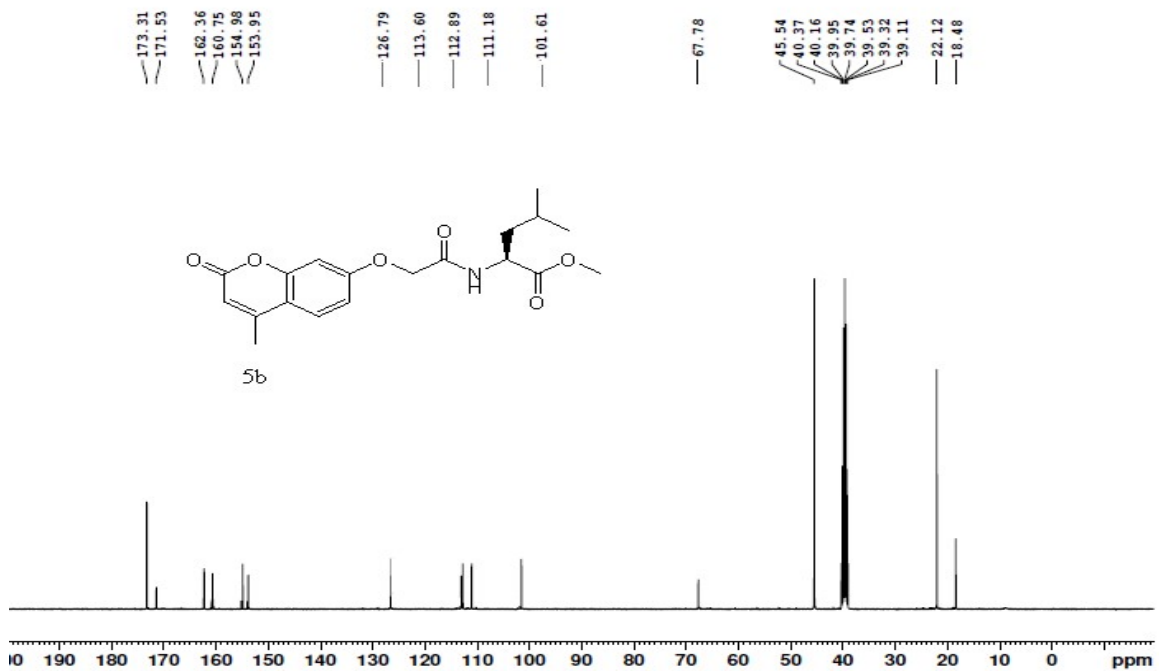

### Mass spectroscopy of Compound 5b

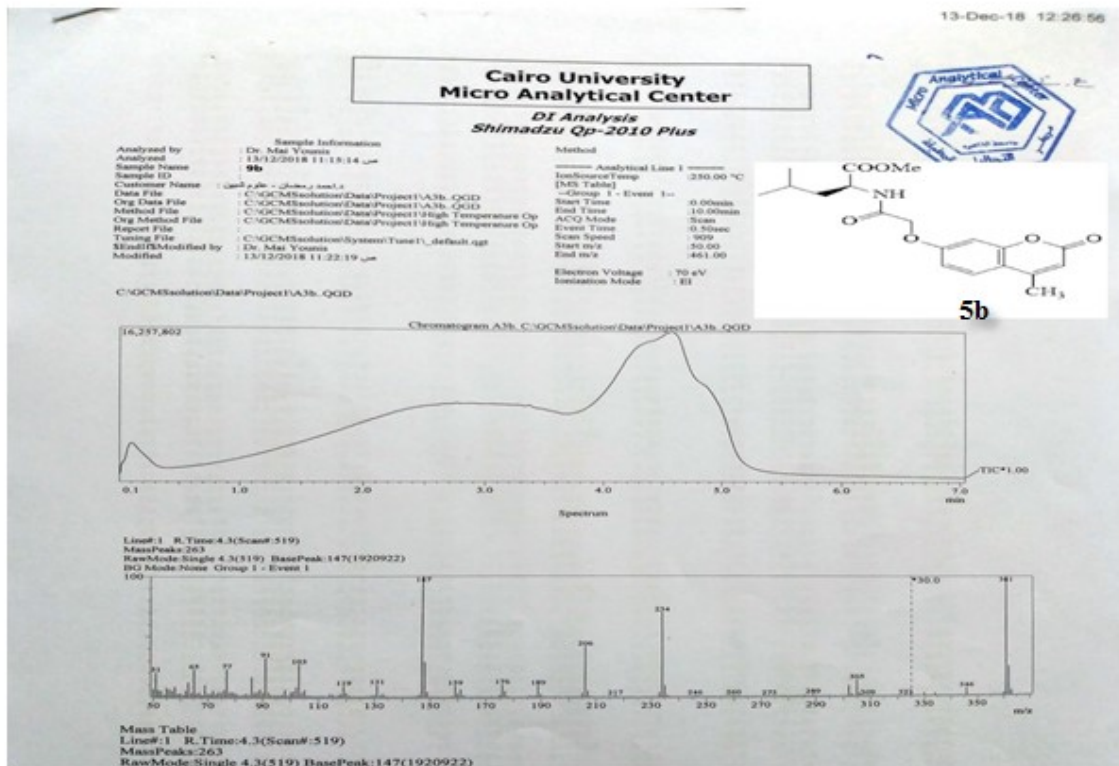

### IR of Compound 5c

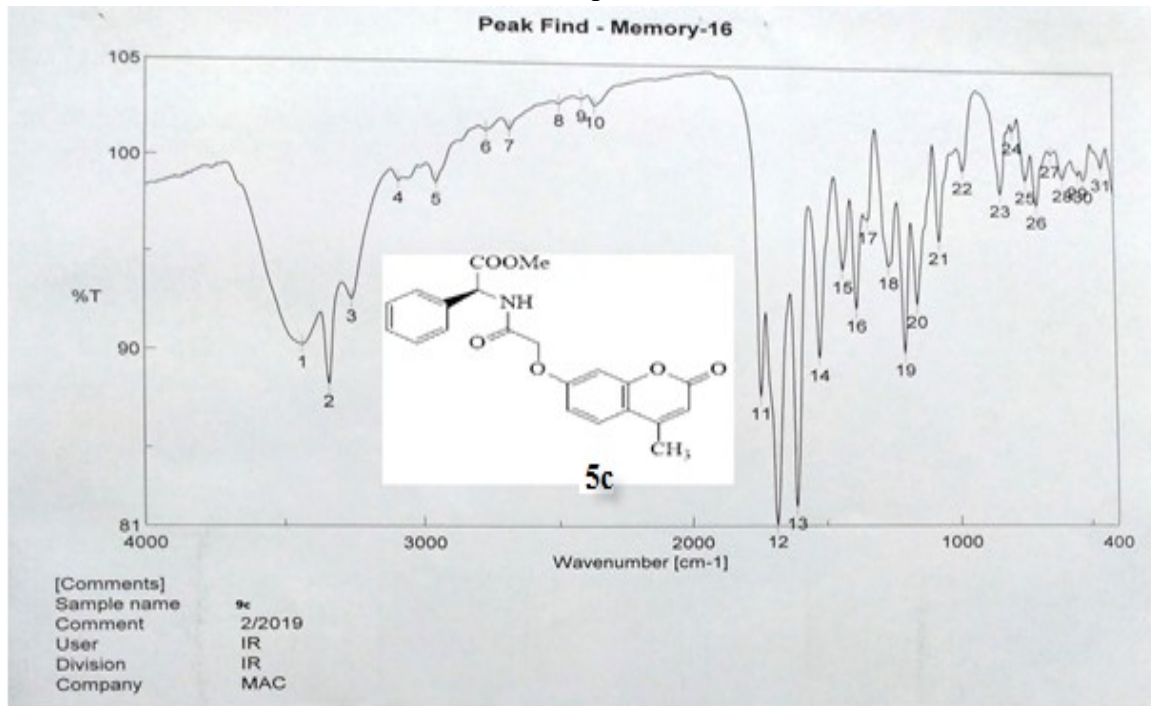

### <sup>1</sup>H NMR of Compound 5c

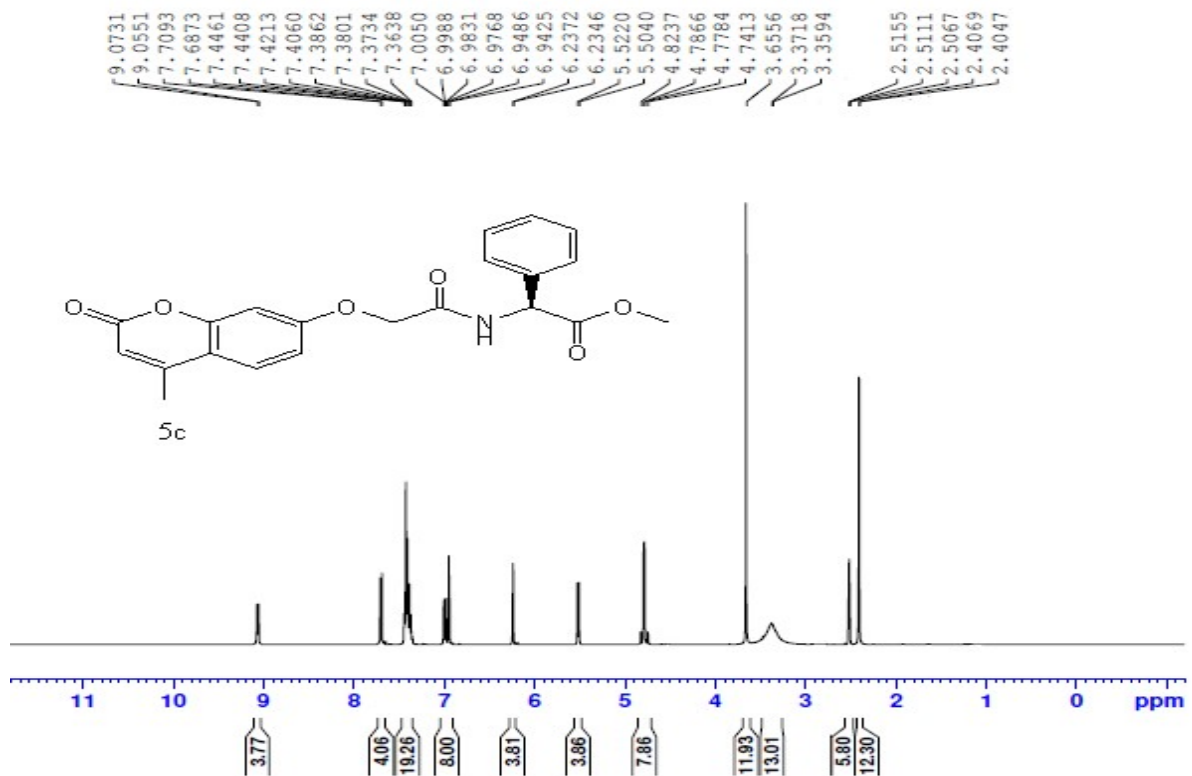

### <sup>13</sup>C NMR of Compound 5c

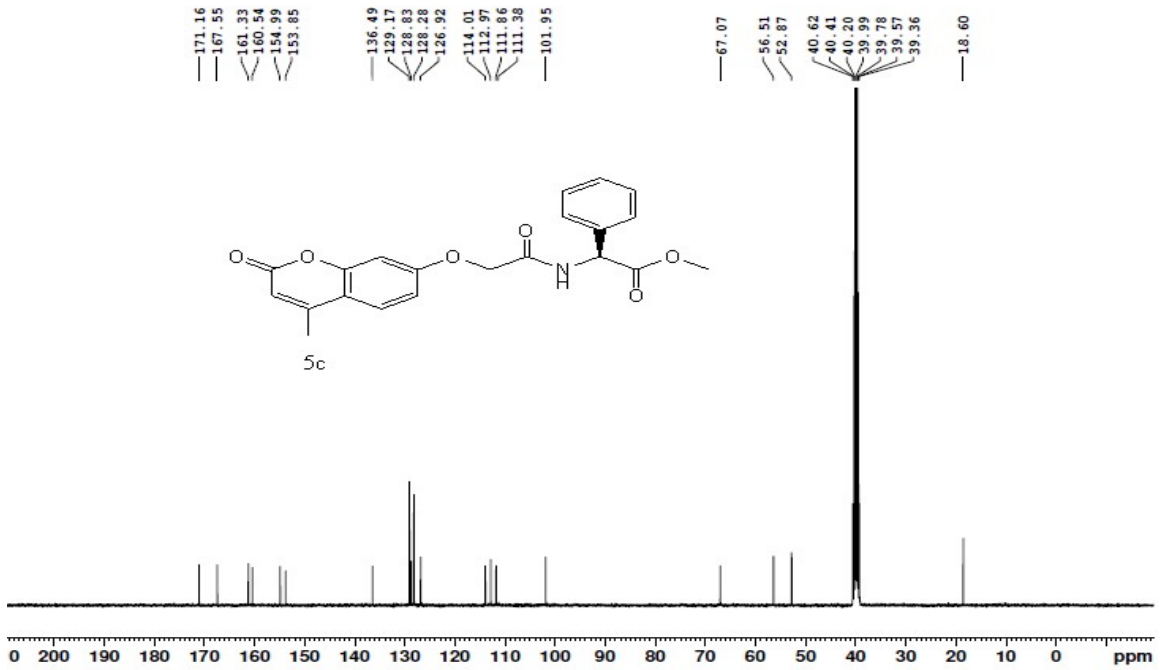

### Mass spectroscopy of Compound 5c

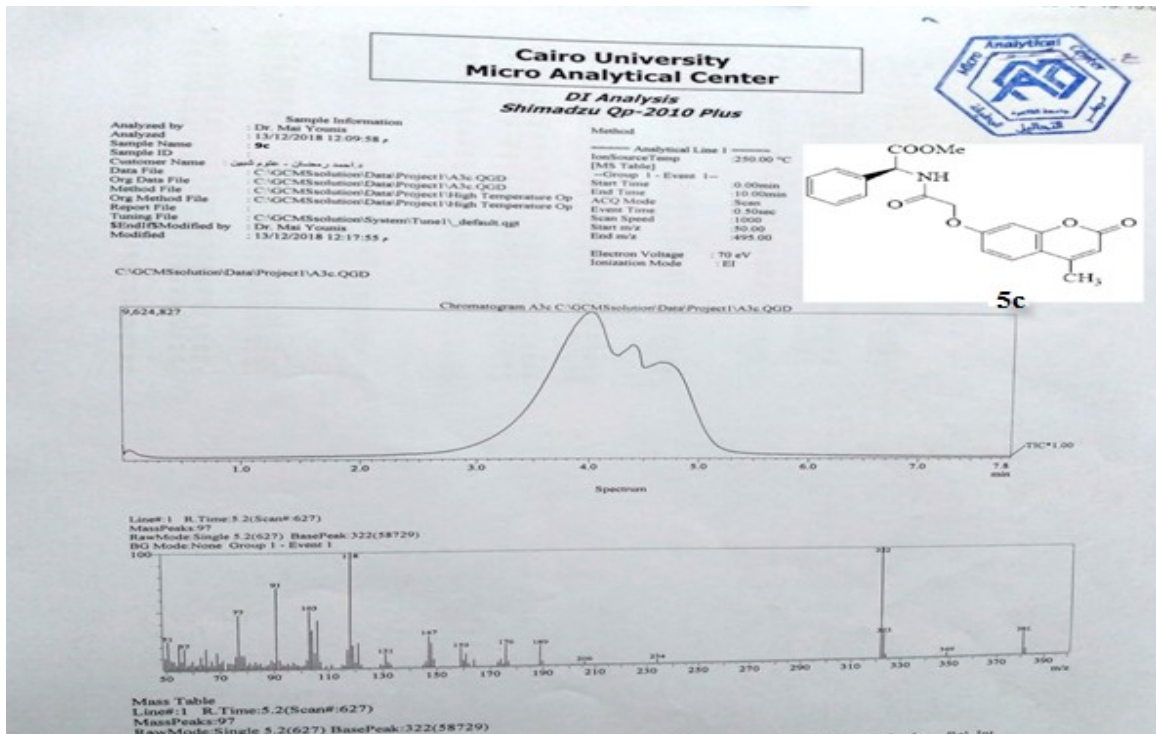

### IR of Compound 6

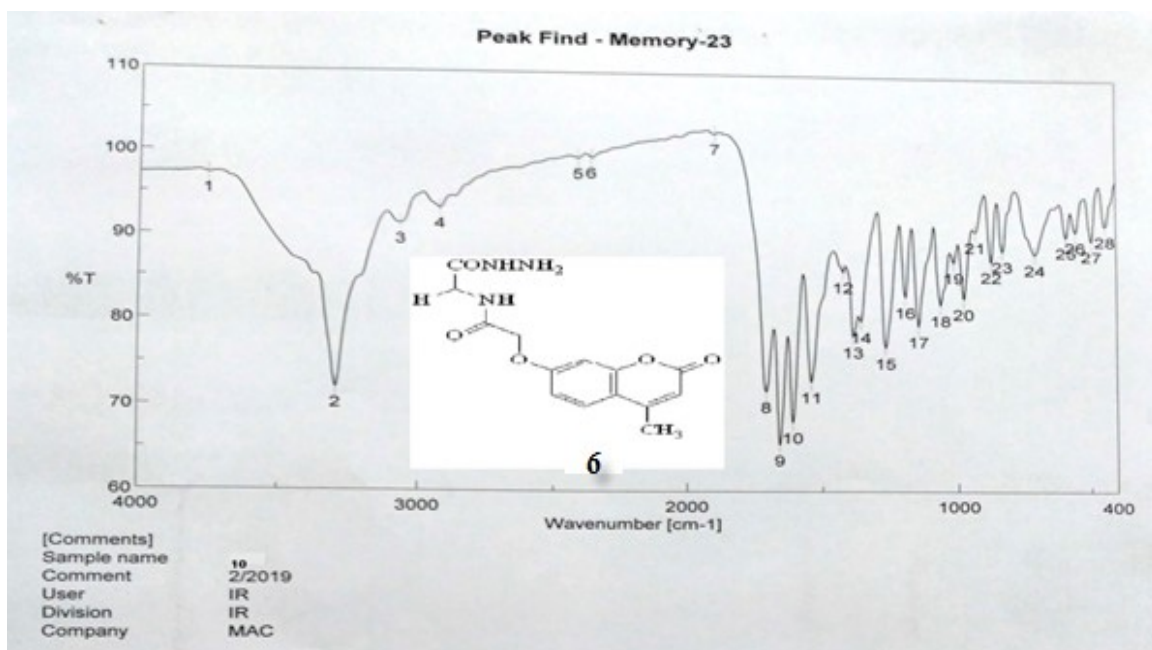

IR of Compound 7a

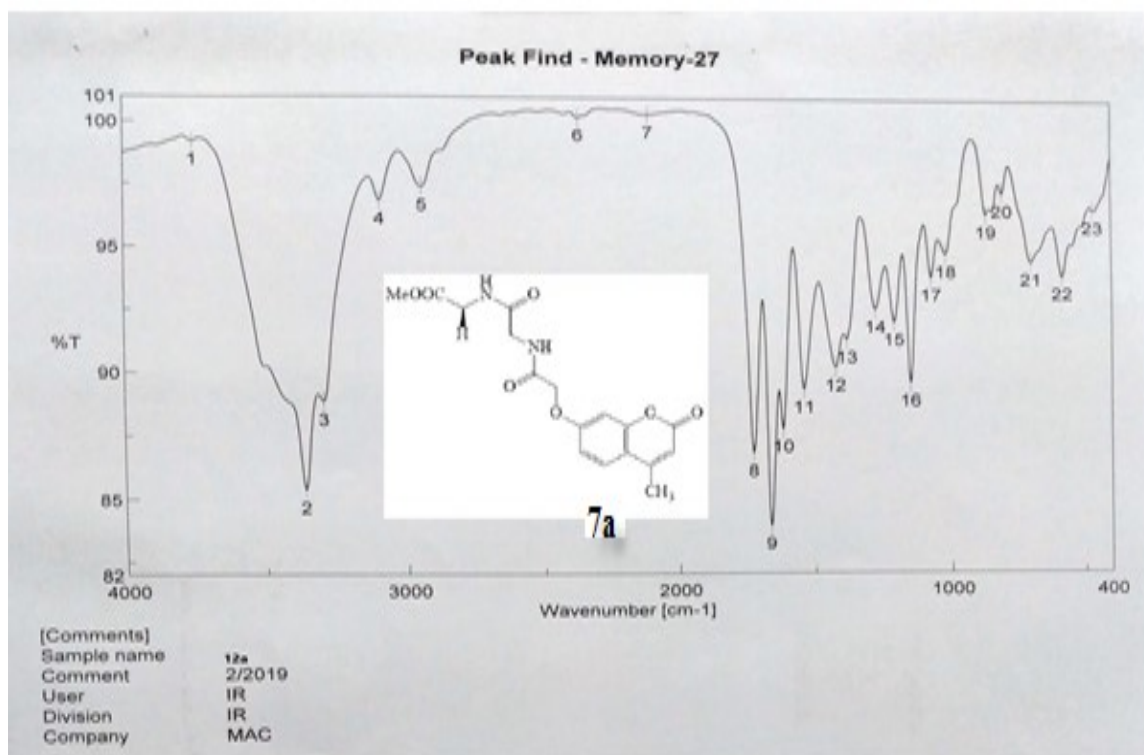

<sup>1</sup>H NMR of Compound 7a



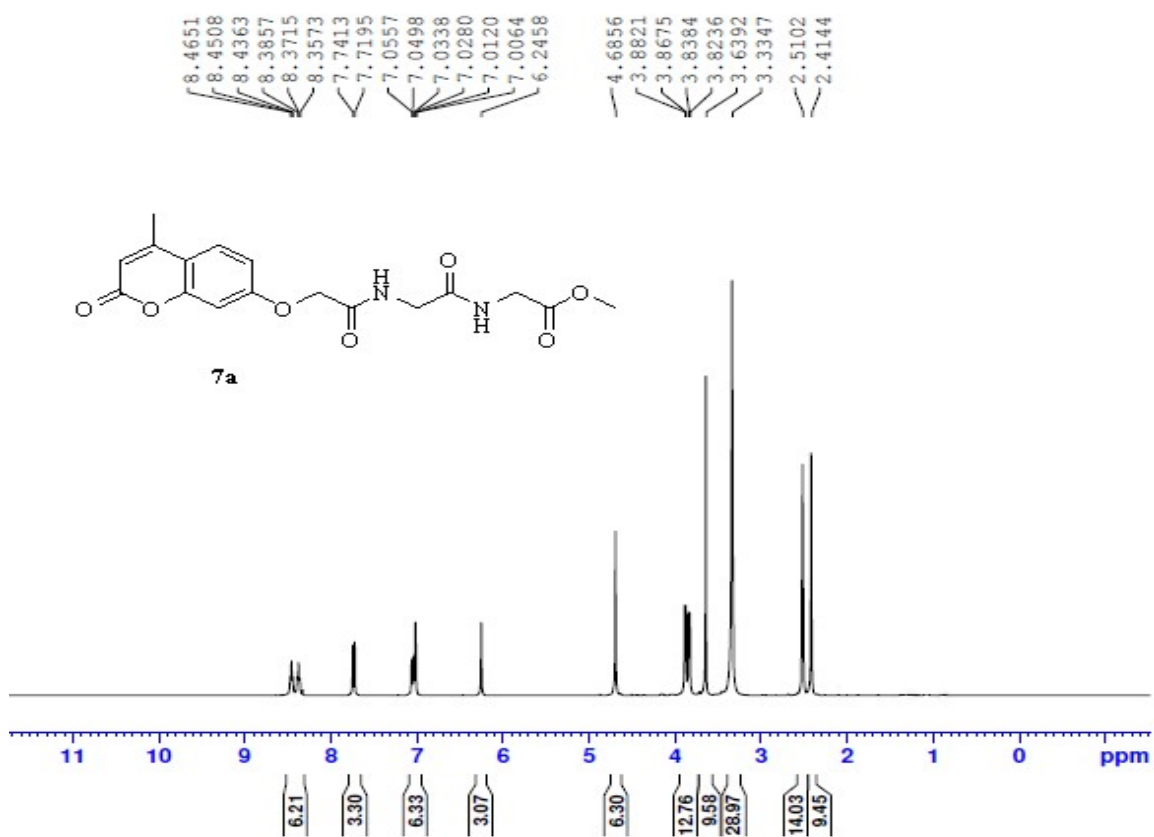

<sup>13</sup>C NMR of Compound 7a

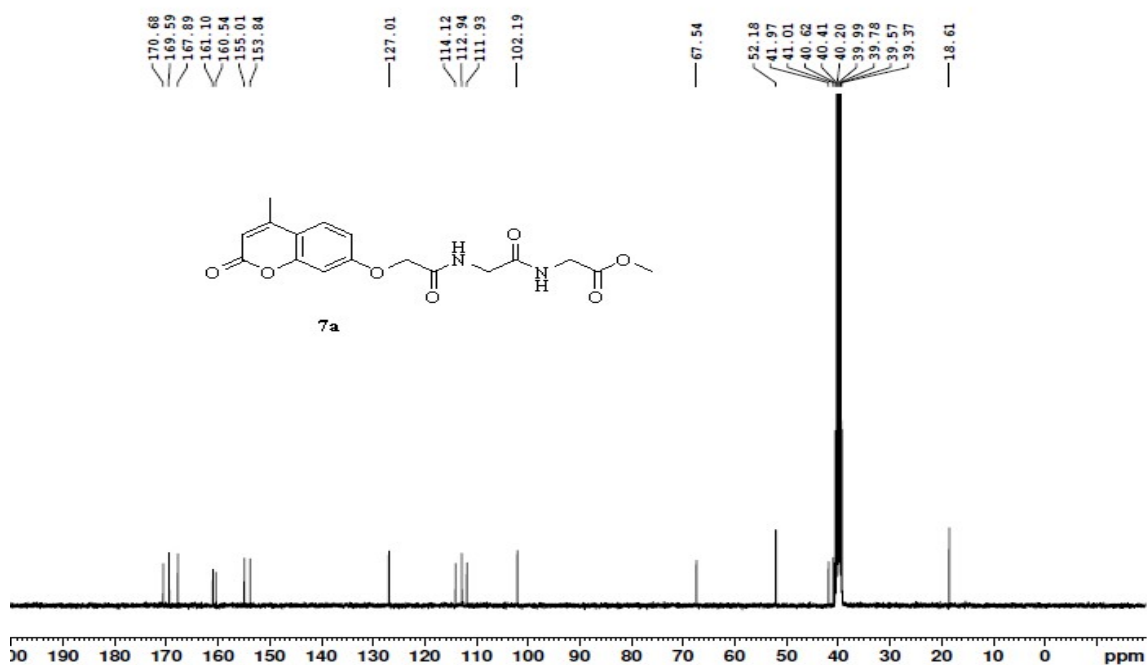

Mass spectrometry of Compound 7a

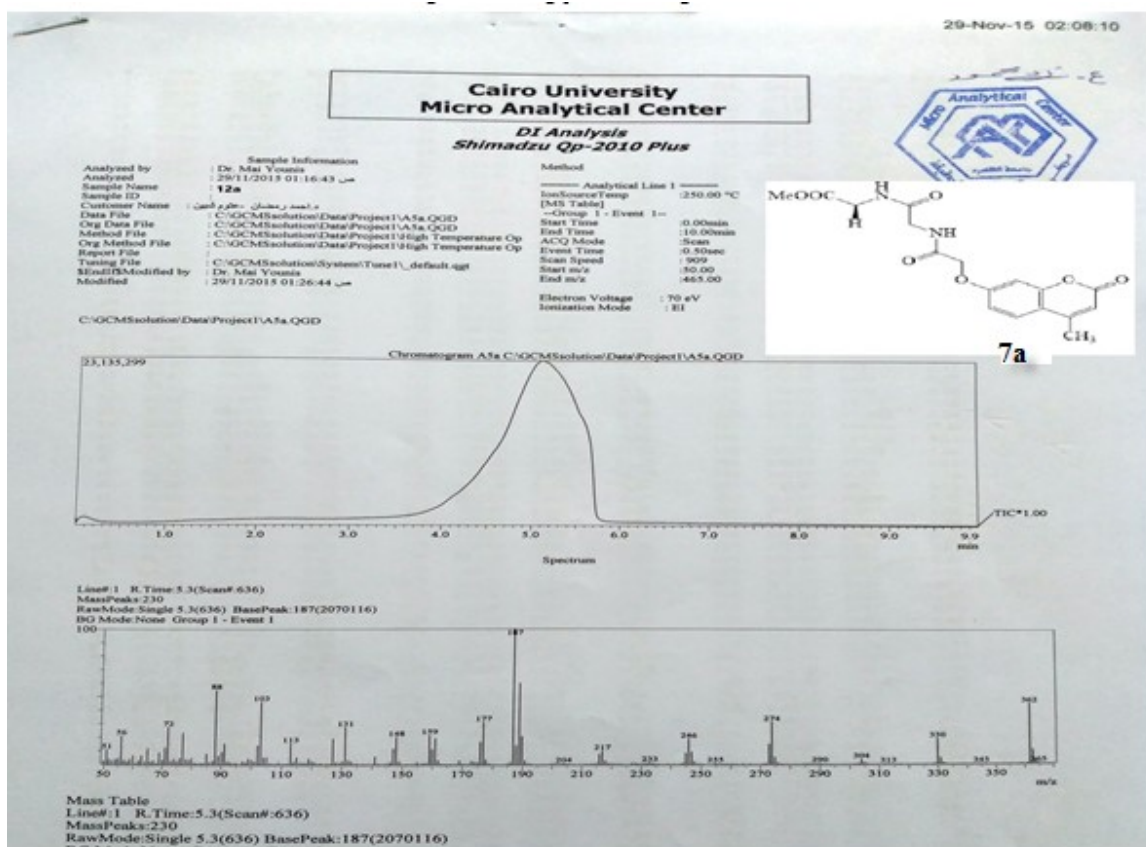

IR of Compound 7b

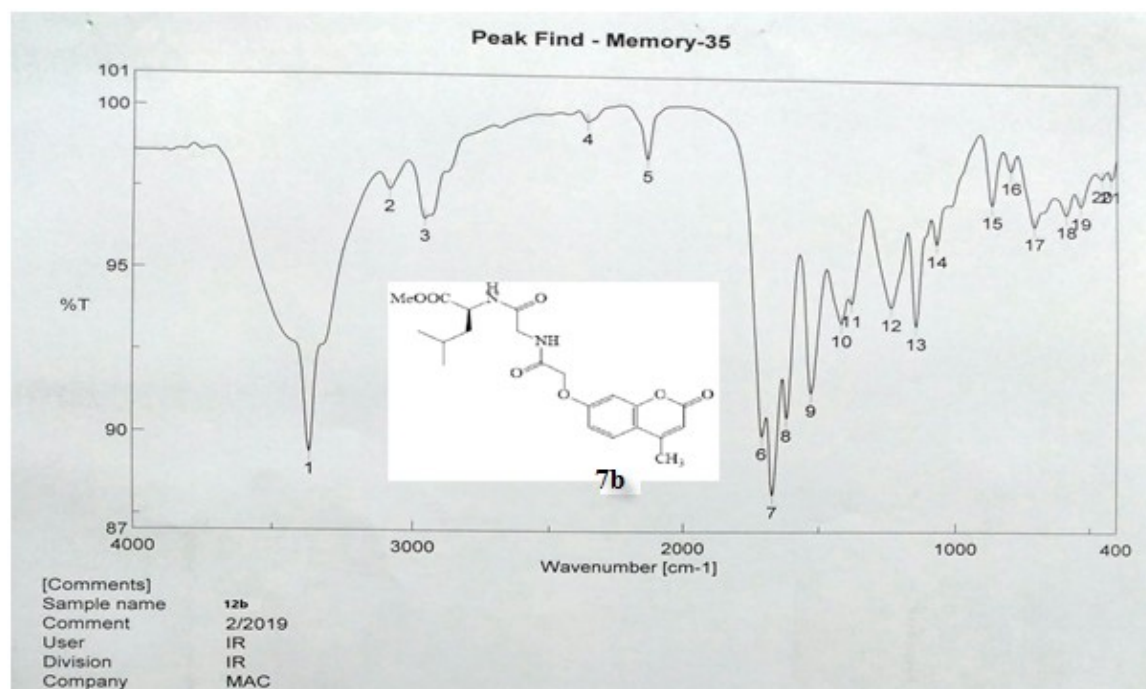

### <sup>1</sup>H NMR of Compound 7b

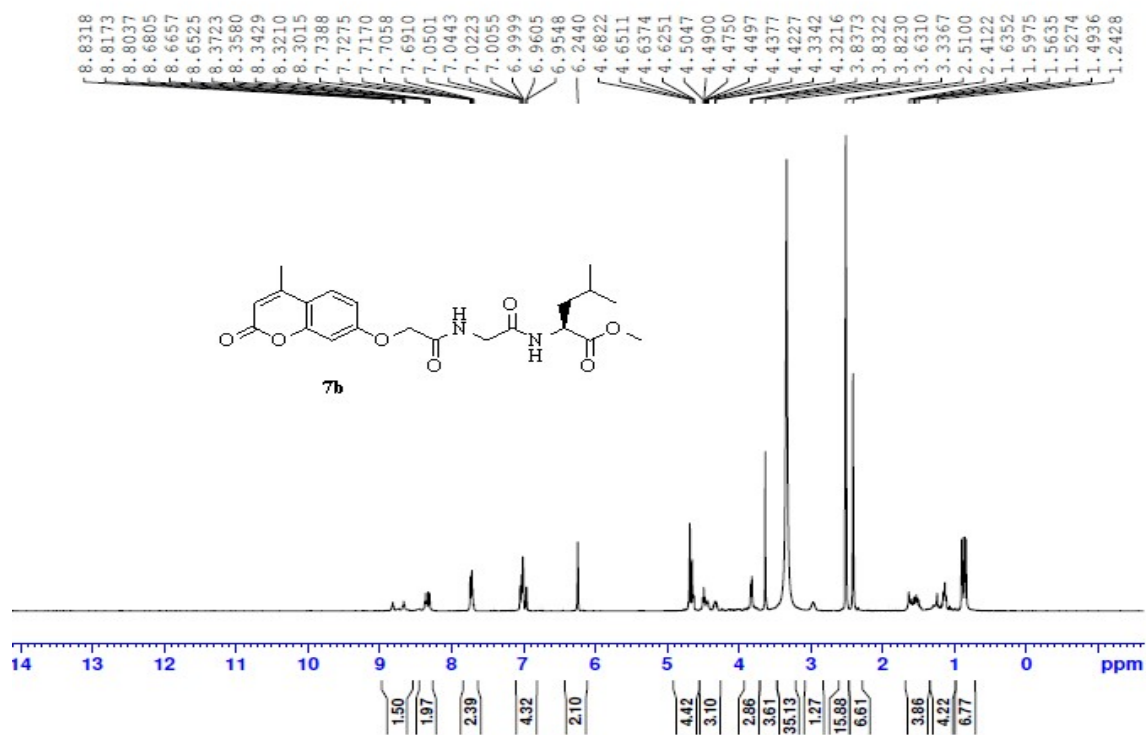

### <sup>13</sup>C NMR of Compound 7b

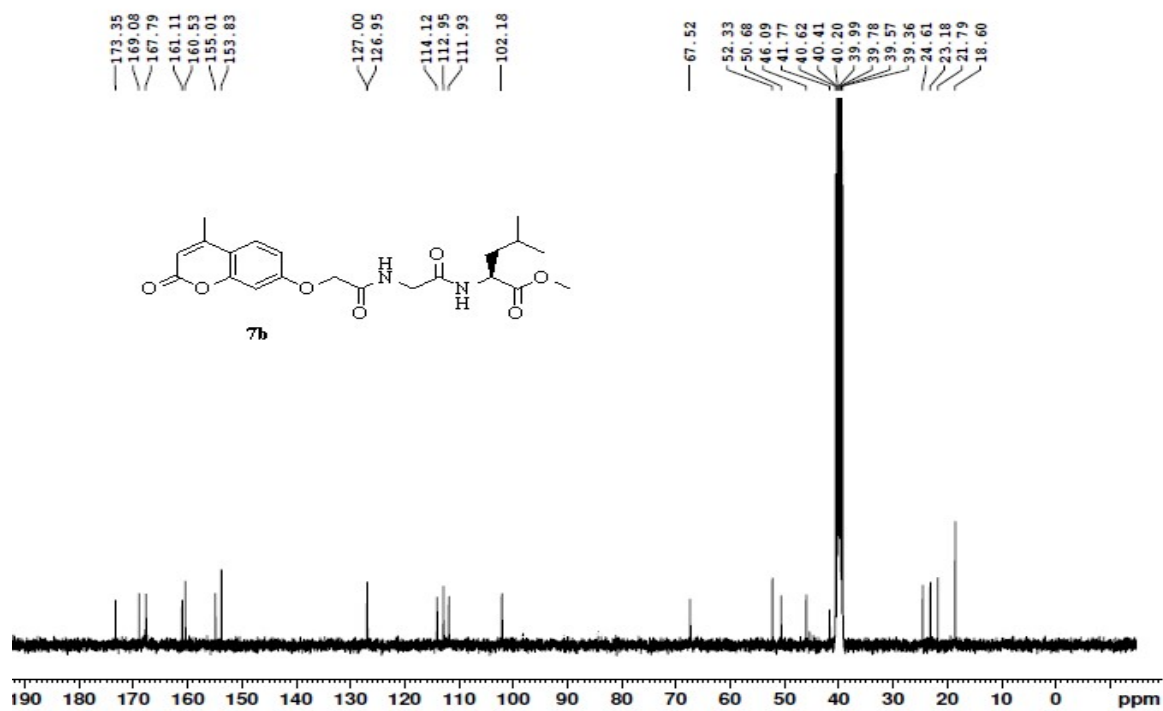

### Mass spectrometry of Compound 7b

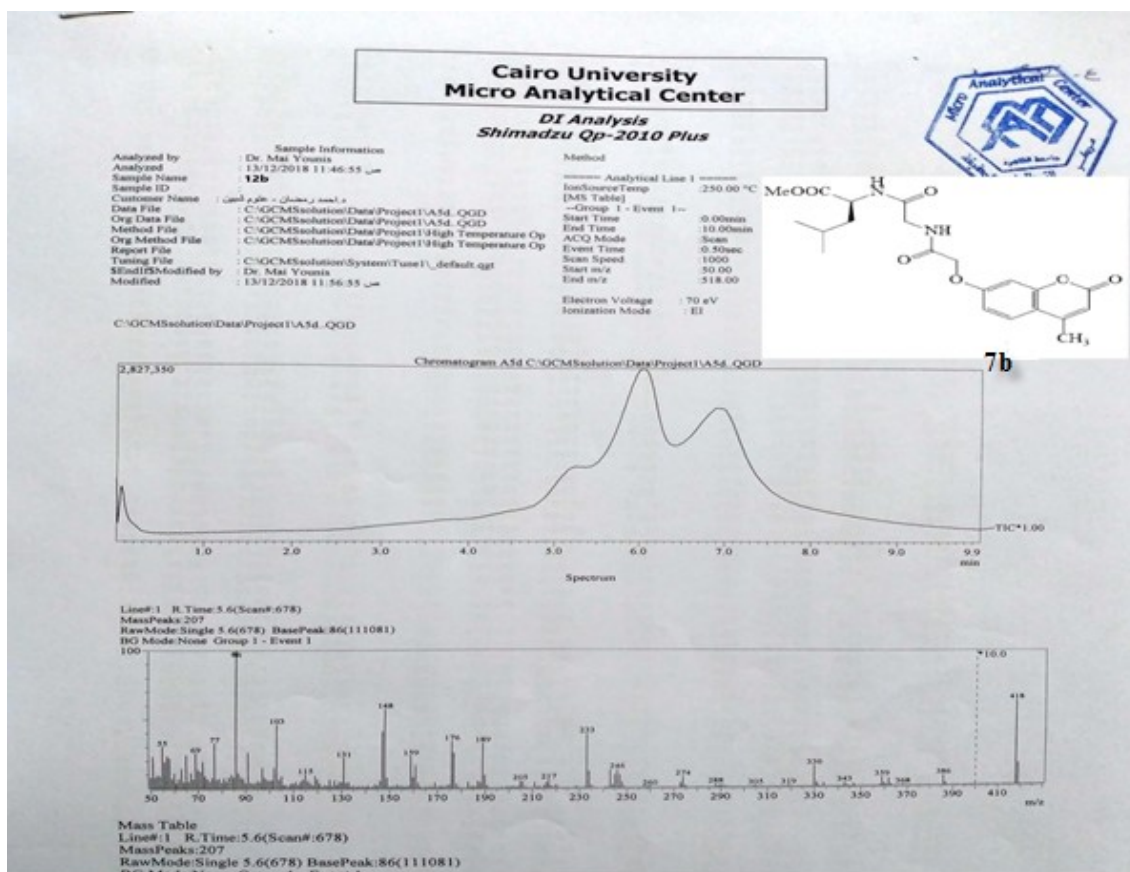

IR of Compound 7c

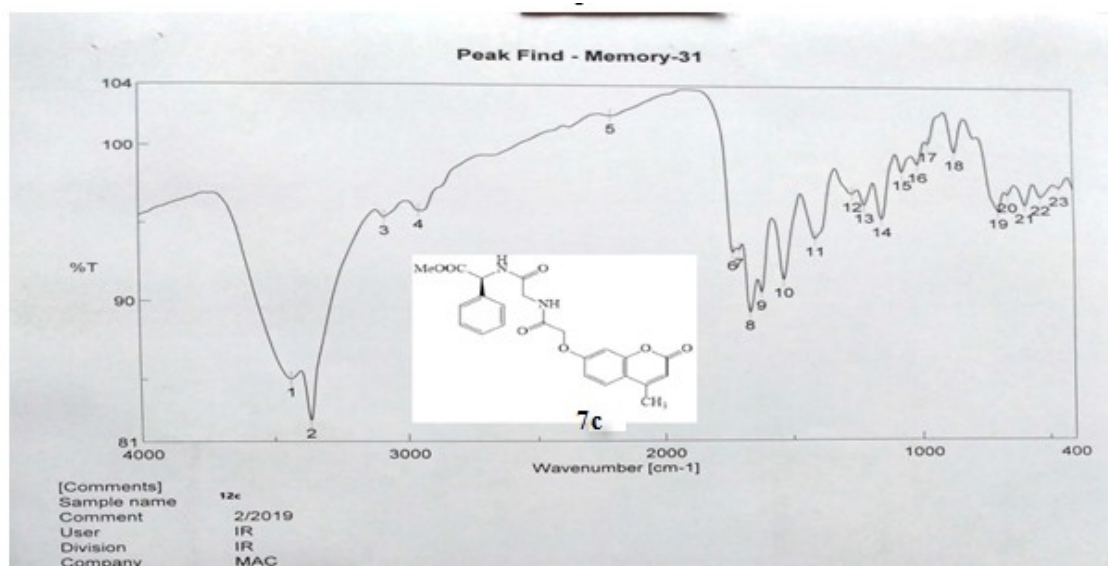

<sup>1</sup>H NMR of Compound 7c

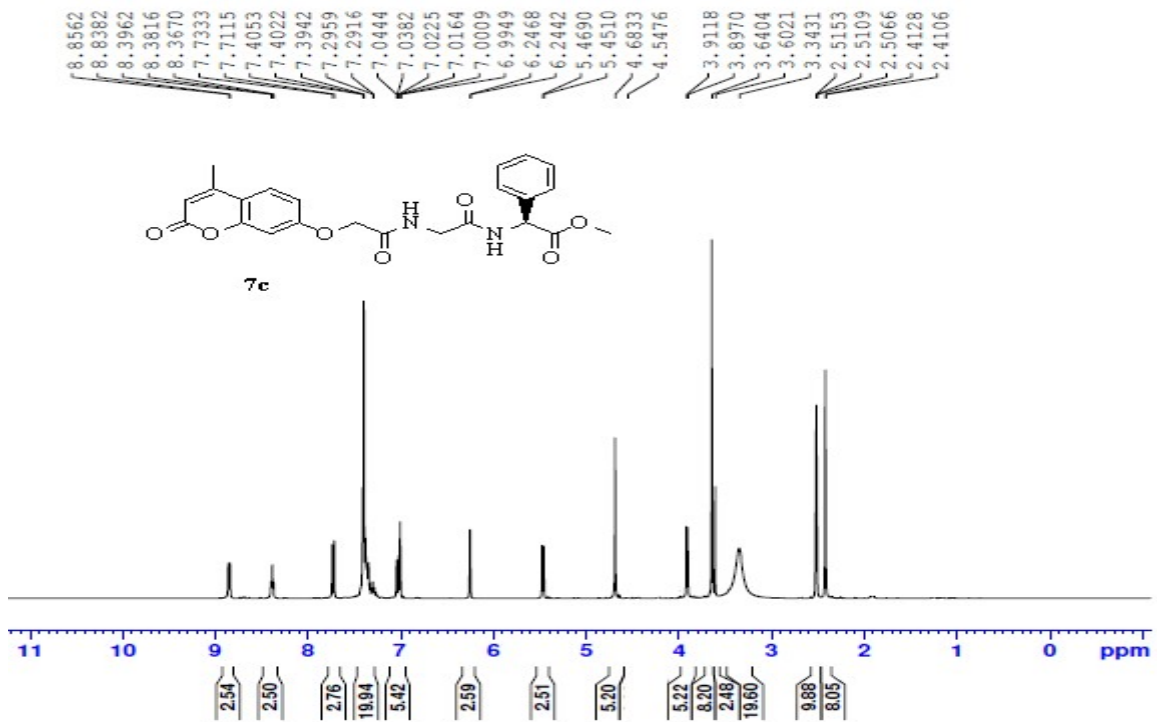

<sup>13</sup>C NMR of Compound 7c

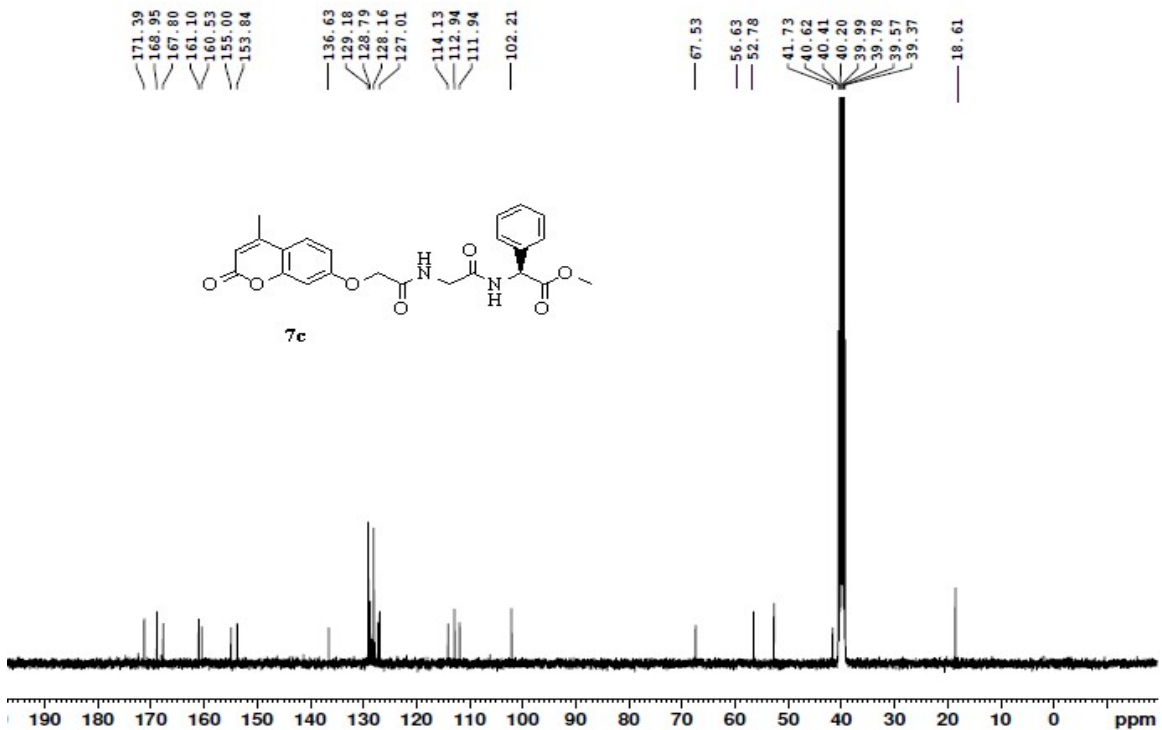

## Mass spectroscopy of Compound 7c

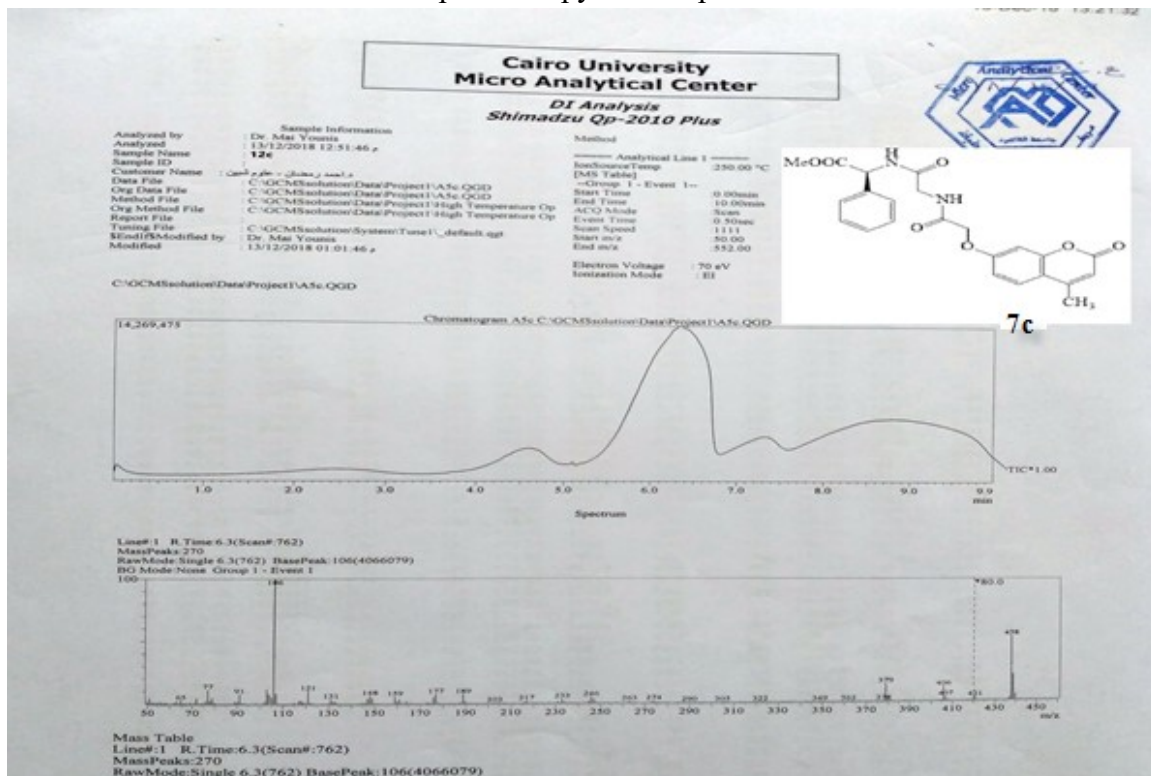

## IR of Compound 8

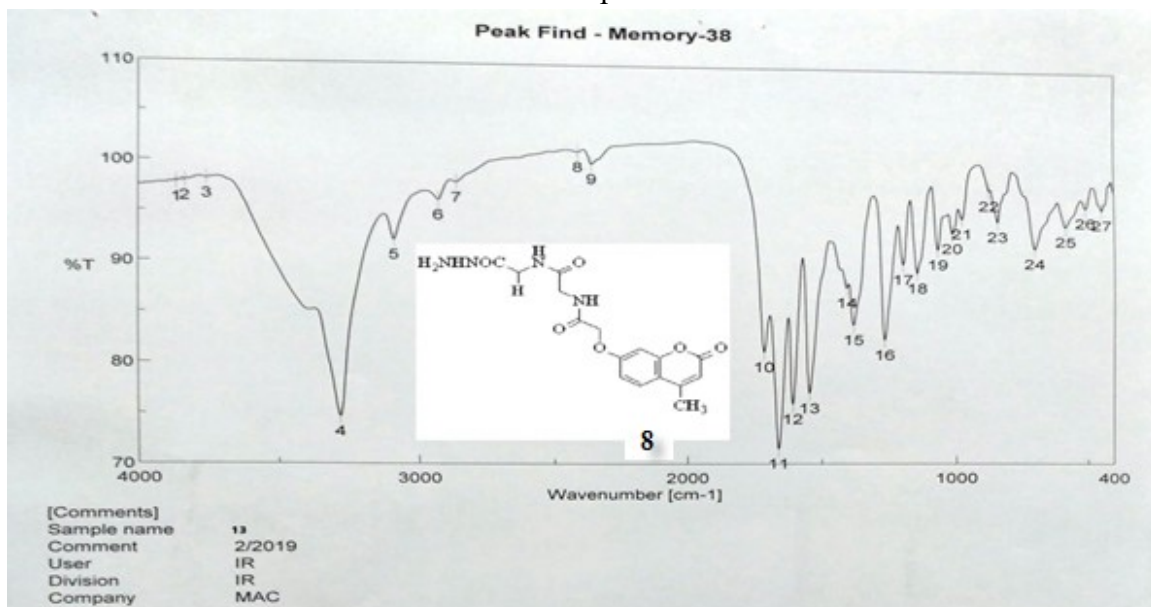

## IR of Compound 9a

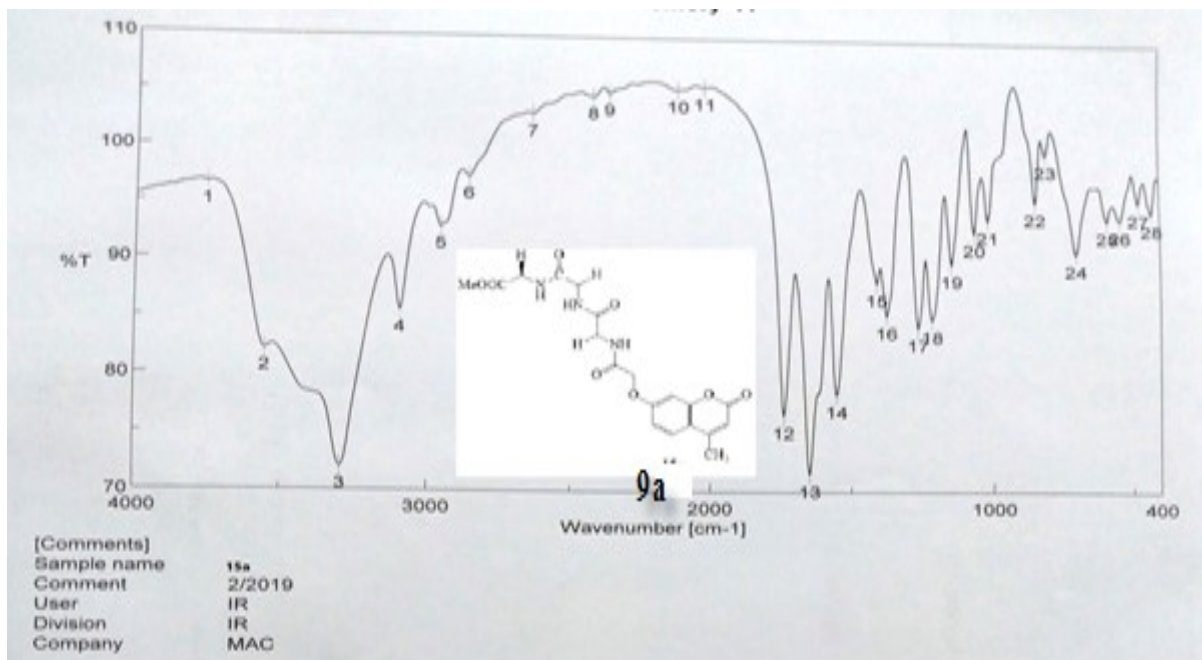

<sup>1</sup>H NMR of Compound 9a

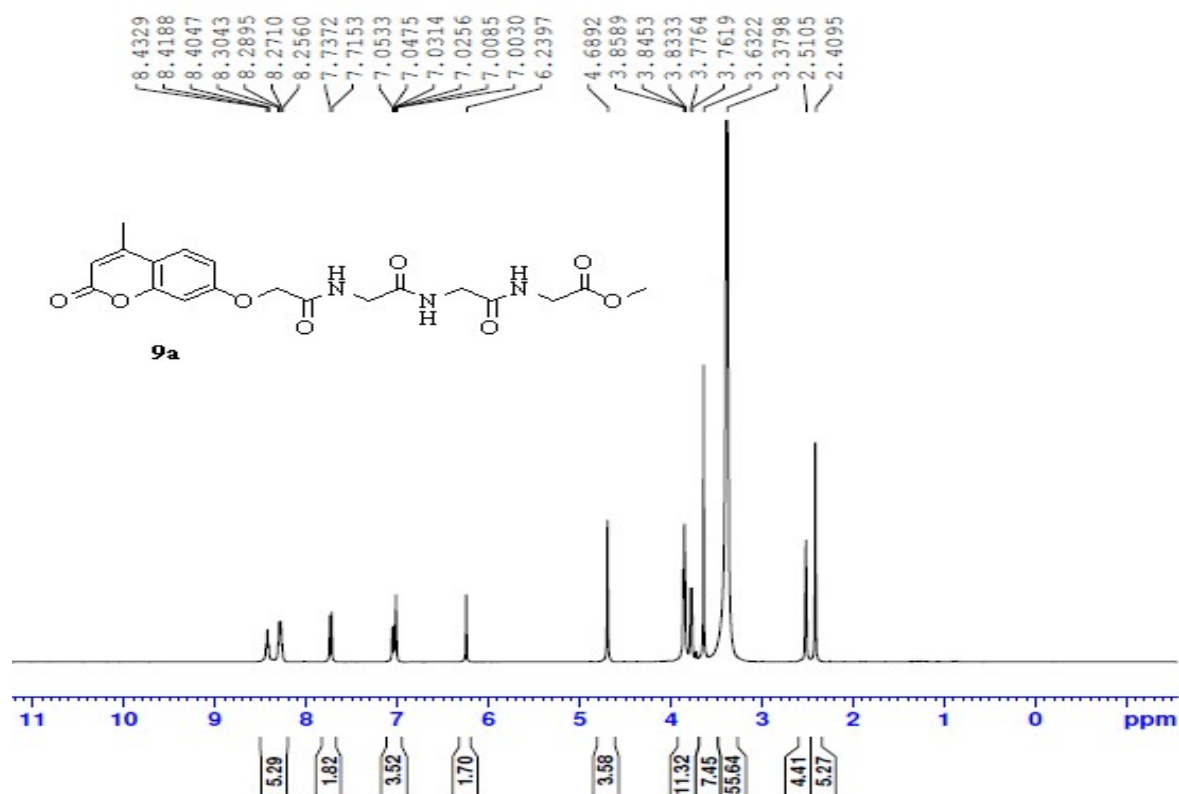

<sup>13</sup>C NMR of Compound 9a

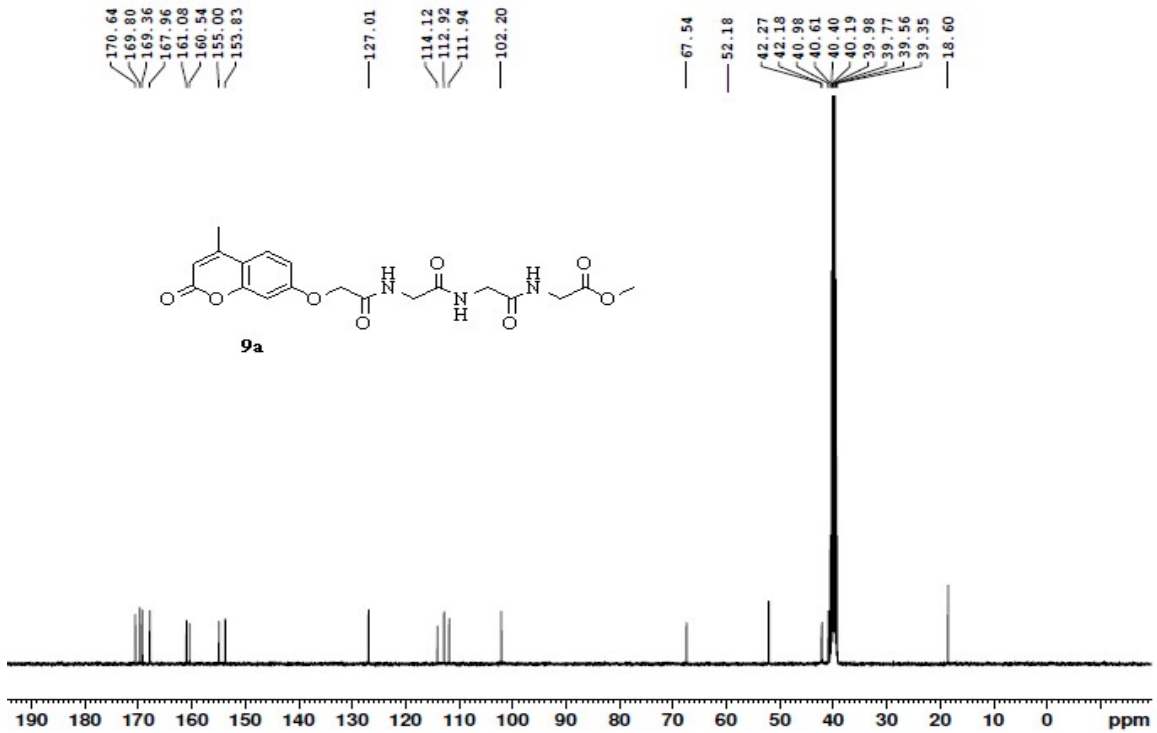

Mass spectroscopy of Compound 9a

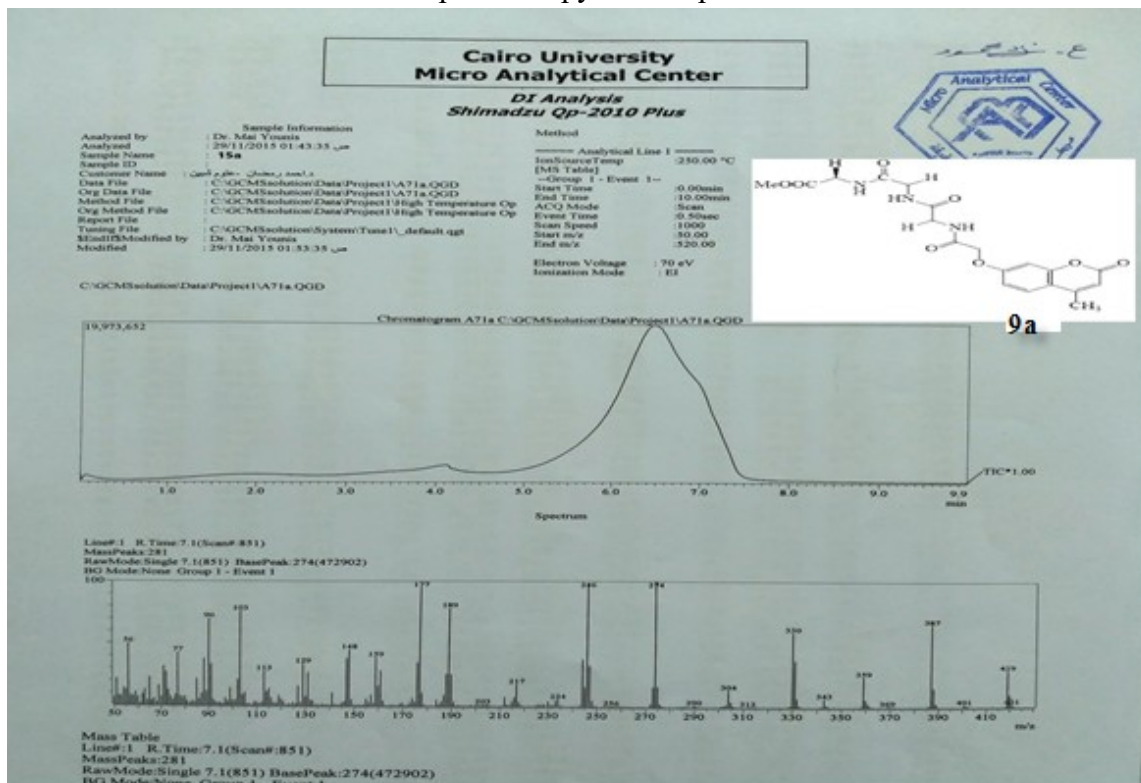

IR of Compound 9b



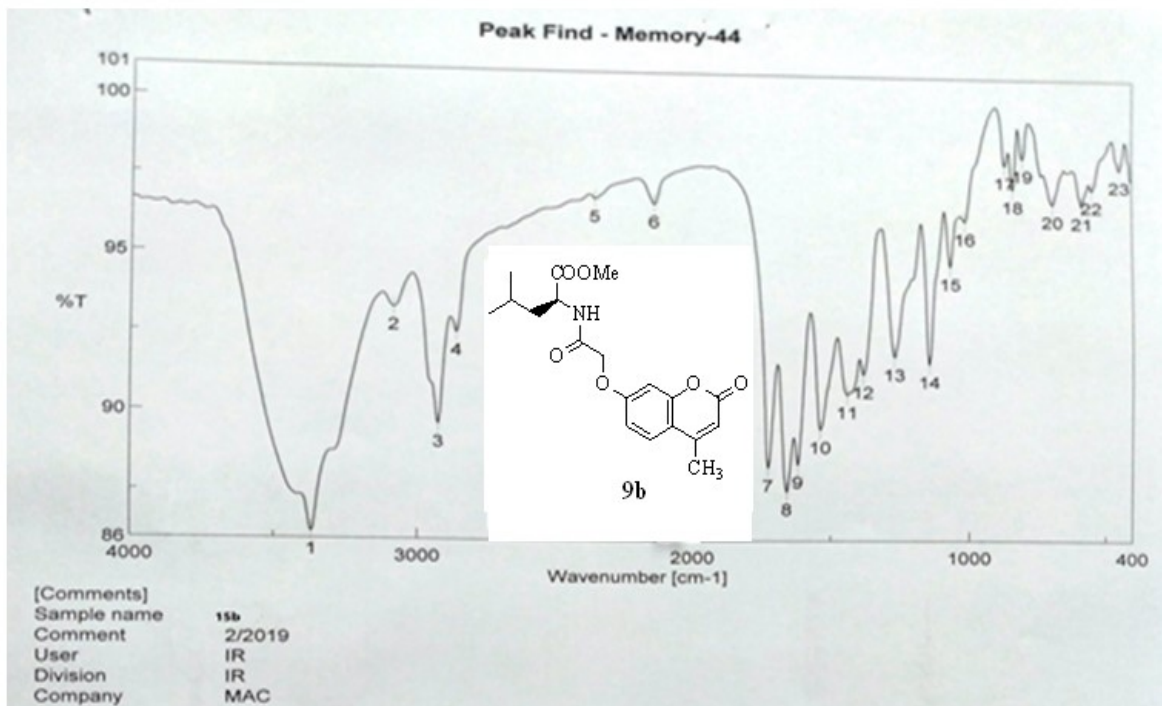

### <sup>1</sup>H NMR of Compound 9b

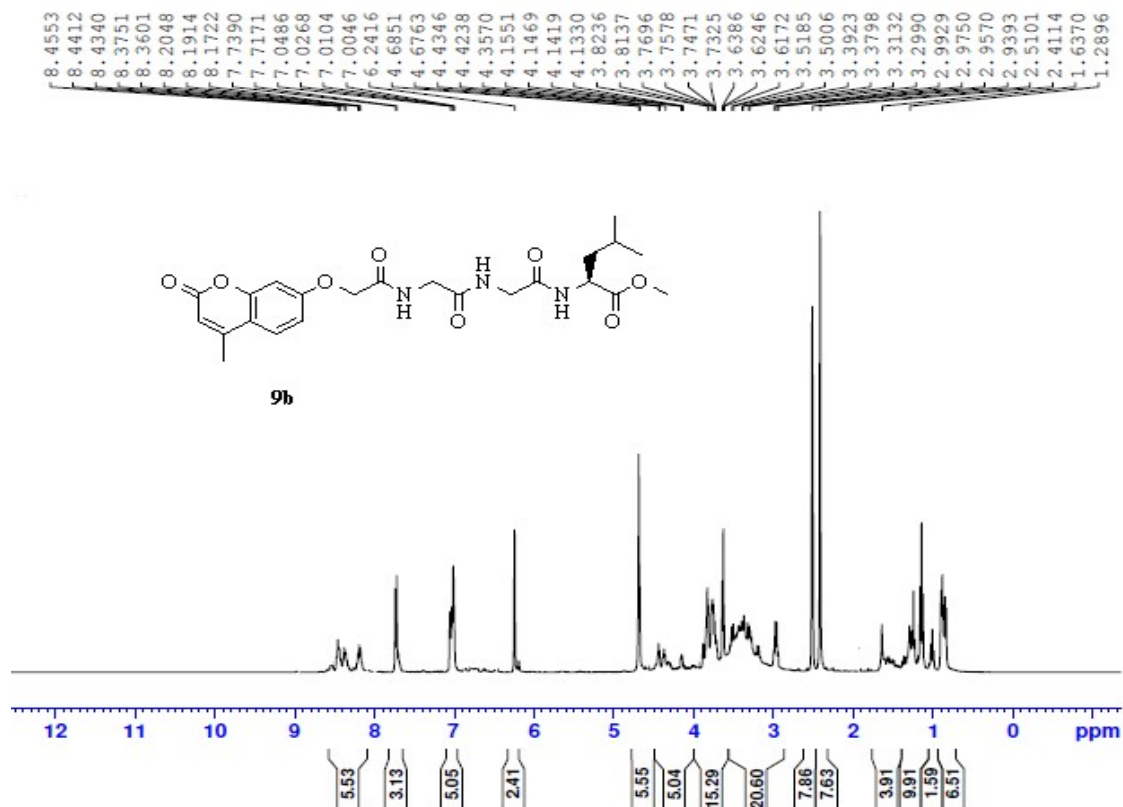

### <sup>13</sup>C NMR of Compound 9b

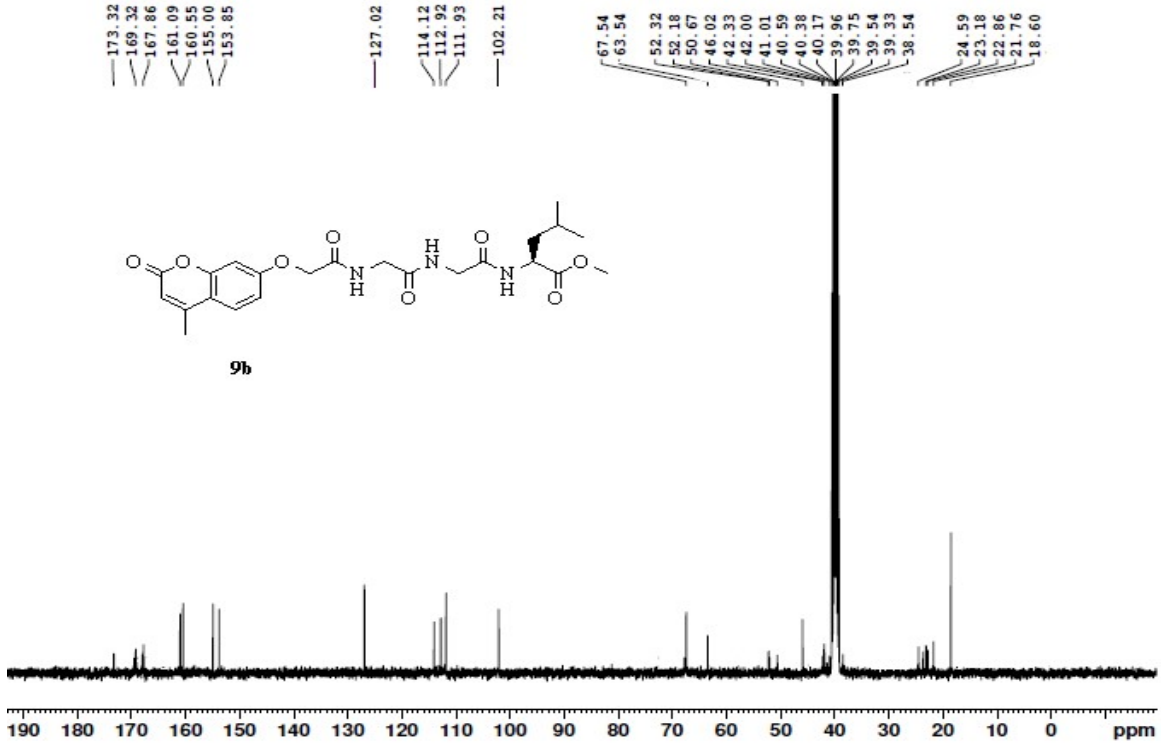

Mass spectroscopy of Compound 9b

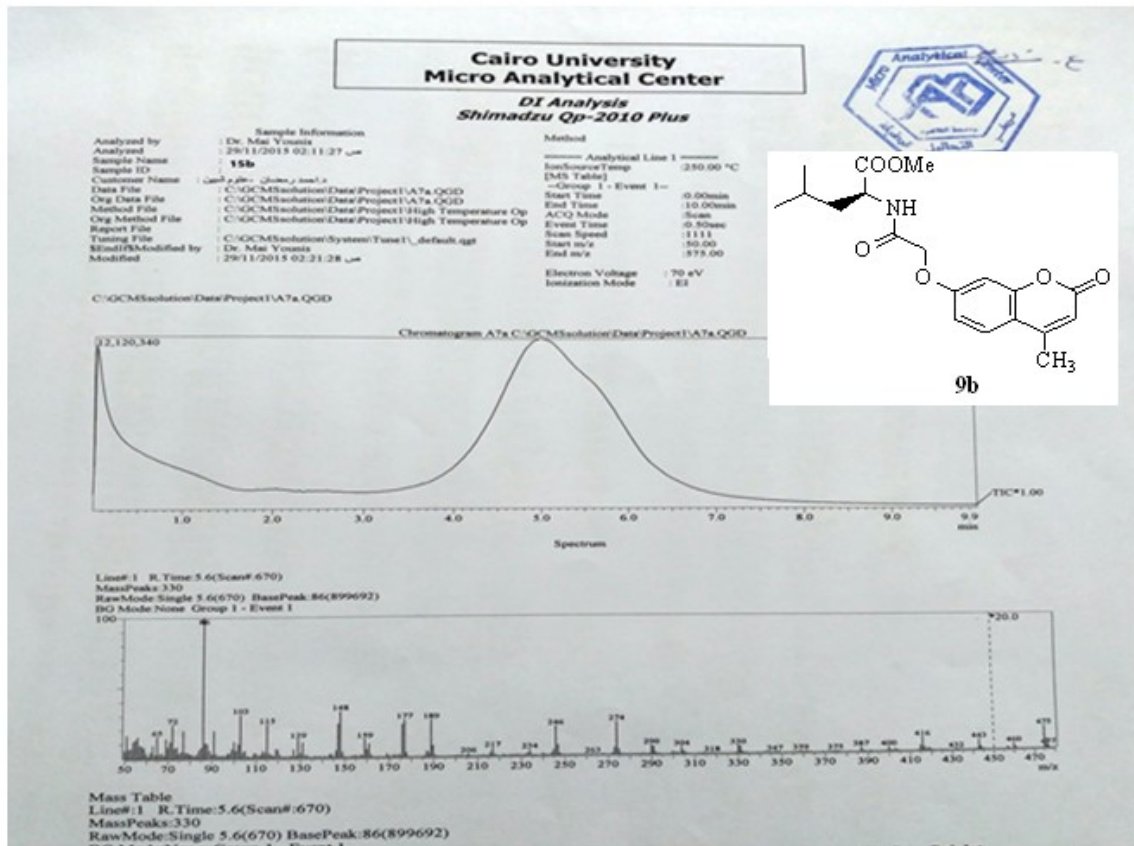

### IR of Compound 9c

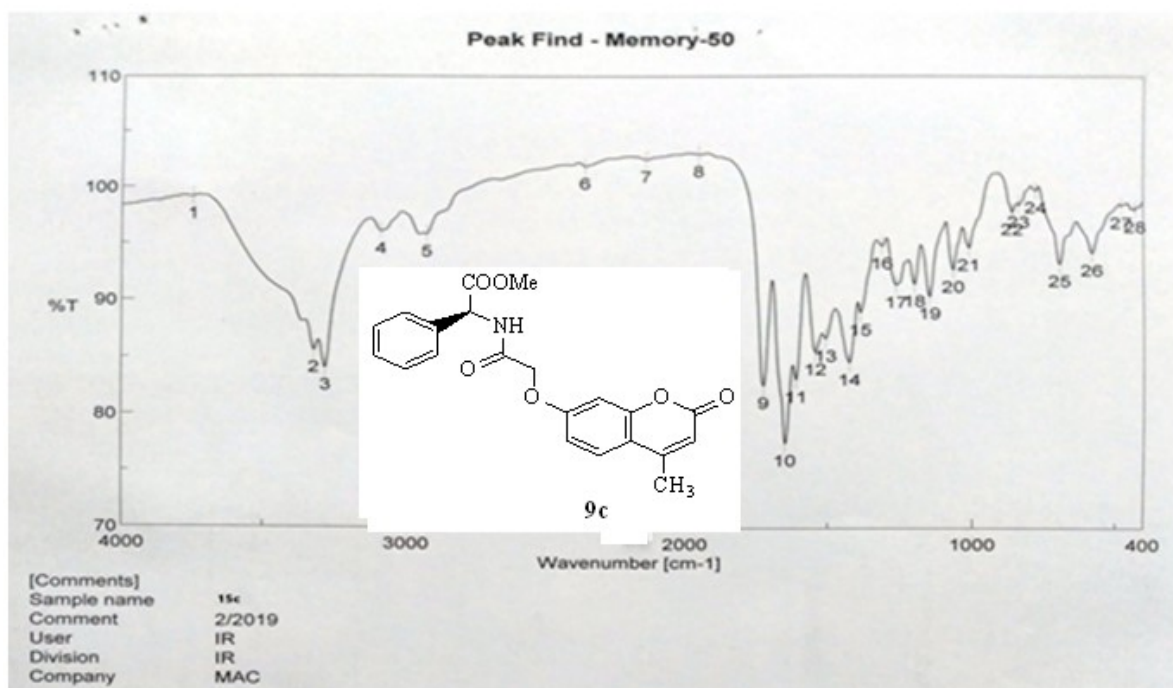

### <sup>1</sup>H NMR of Compound 9c

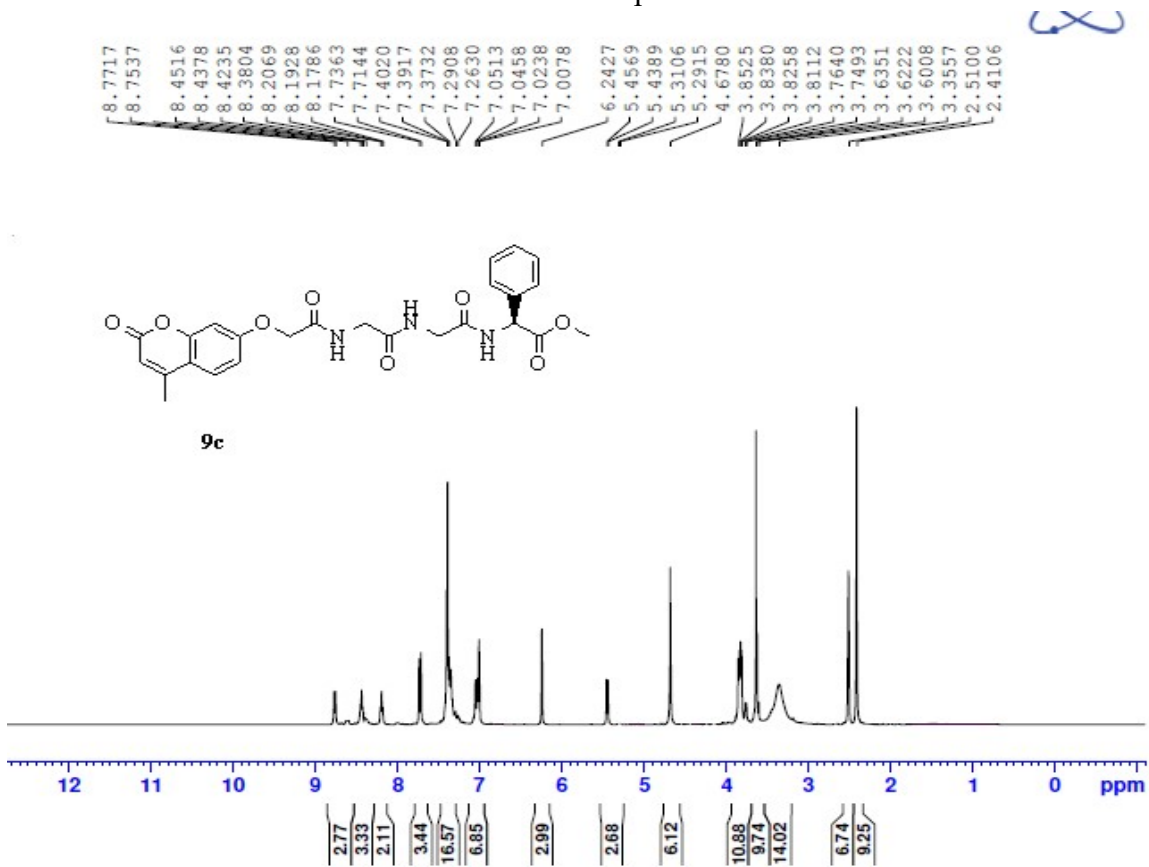

### <sup>13</sup>C NMR of Compound 9c

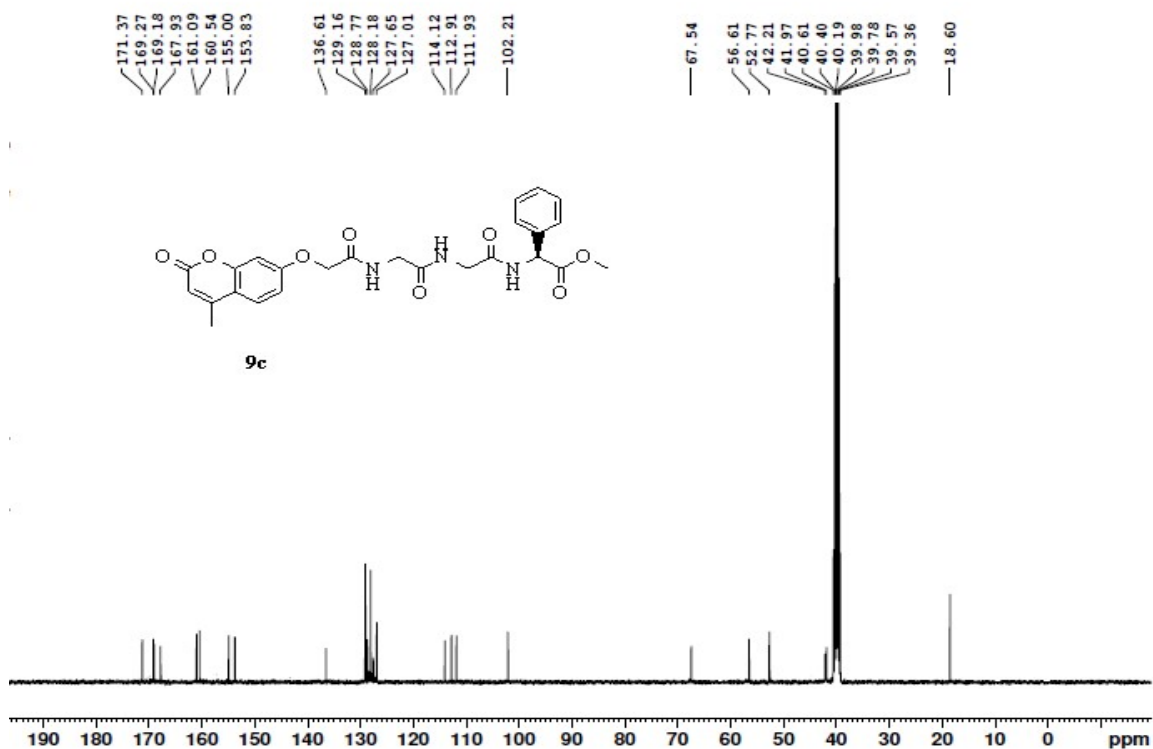

### Mass spectroscopy of Compound 9c

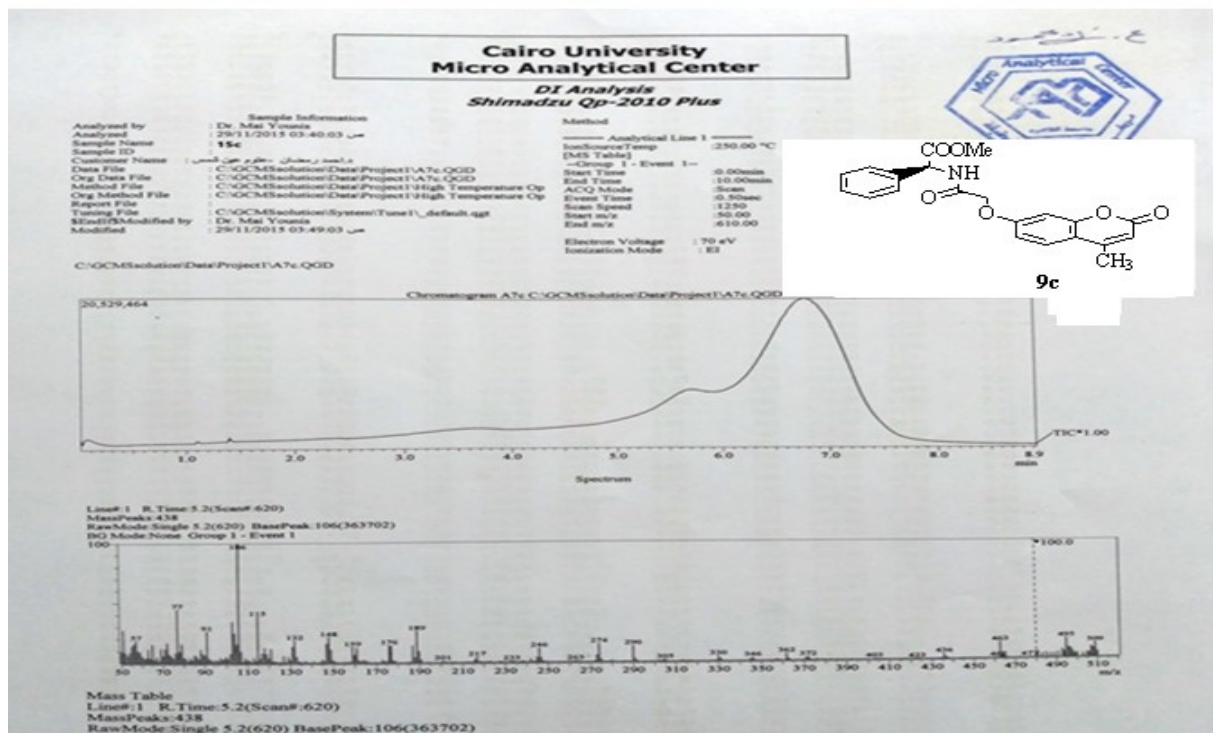

Table (1)

|           | <sup>a</sup> QPlogS | <sup>b</sup> Caco | <sup>c</sup> Percentage Human/ oral absorption | <sup>d</sup> QPlogKhsa | <sup>e</sup> LogBB | <sup>f</sup> MW | <sup>g</sup> HBD | <sup>h</sup> HBA | <sup>i</sup> QPlog(O/w) | <sup>j</sup> MDCK |
|-----------|---------------------|-------------------|------------------------------------------------|------------------------|--------------------|-----------------|------------------|------------------|-------------------------|-------------------|
| <b>5a</b> | -3.646              | 181.355           | 64.010                                         | -0.675                 | -1.579             | 305.287         | 0.250            | 7.000            | 0.770                   | 144.494           |
| <b>5b</b> | -3.646              | 199.349           | 81.479                                         | -0.182                 | -1.548             | 361.394         | 0.250            | 7.000            | 2.410                   | 140.667           |
| <b>5c</b> | -4.417              | 155.169           | 81.879                                         | -0.101                 | -1.557             | 381.384         | 0.250            | 7.000            | 2.331                   | 133.414           |
| <b>6</b>  | -4.417              | 213.401           | 42.985                                         | -0.809                 | -1.098             | 305.290         | 0.250            | 7.000            | 2.685                   | 187.87            |
| <b>7a</b> | -2.343              | 13.956            | 48.247                                         | -0.971                 | -2.662             | 362.338         | 0.500            | 8.750            | 0.139                   | 17.540            |
| <b>7b</b> | -3.478              | 25.835            | 62.284                                         | -0.471                 | -2.575             | 418.446         | 0.500            | 8.750            | 1.719                   | 35.052            |
| <b>7c</b> | -4.246              | 31.876            | 65.625                                         | -0.407                 | -2.432             | 438.436         | 0.500            | 8.750            | 2.009                   | 39.495            |
| <b>8</b>  | -2.077              | 31.762            | 23.323                                         | -1.133                 | -2.437             | 362.341         | 3.500            | 9.750            | -1.257                  | 39.340            |
| <b>9a</b> | -2.164              | 3.161             | 19.983                                         | -1.288                 | -3.526             | 419.390         | 0.750            | 10.500           | -0.504                  | 6.110             |
| <b>9b</b> | -3.497              | 3.481             | 29.567                                         | -0.774                 | -3.709             | 475.497         | 0.750            | 10.500           | 1.005                   | 8.221             |
| <b>9c</b> | -4.058              | 2.585             | 28.675                                         | -0.689                 | -3.821             | 495.488         | 0.750            | 10.500           | 1.248                   | 6.389             |

<sup>a</sup>Predicted aqueous solubility; log S in mol/L (acceptable range; -6.5-0.5), <sup>b</sup>Predicted apparent Caco-2 cell permeability in nm/sec; (<25% is poor and >500% is great), <sup>c</sup>percentage of human oral absorption; (<25% is poor and >80% is high), <sup>d</sup>prediction of binding to human serum albumin; (acceptable range; -1.0-1.5), <sup>e</sup>prediction of brain/blood; (acceptable range; -3.0-1.2), <sup>f</sup>molecular weight (<500), <sup>g</sup>Hydrogen bond donor (<5), <sup>h</sup>Hydrogen bond acceptor (<10), <sup>i</sup>Prediction octanol/water partition coefficient log p (acceptable range; -2.0-6.5), <sup>j</sup>Prediction apparent MDCK cell permeability in nm/sec; (<25% is poor and >500% is great), ADME; Absorption, distribution, metabolism and excretion
